# Supplementary material for: Dabigatran initiation in patients with non-valvular AF and first acute ischaemic stroke: a retrospective observational study from the SITS registry
Source: PubMed Central journal article supplement — BMJ Open. 2020 May 19;10(5):e037234. doi: 10.1136/bmjopen-2020-037234 (PMC7247395; doi:10.1136/bmjopen-2020-037234), 2020-05-19
Supplement: bmjopen-2020-037234.draft_revisions.pdf [file bmjopen-2020-037234.draft_revisions.pdf]

# BMJ Open

BMJ Open is committed to open peer review. As part of this commitment we make the peer review history of every article we publish publicly available.

When an article is published we post the peer reviewers' comments and the authors' responses online. We also post the versions of the paper that were used during peer review. These are the versions that the peer review comments apply to.

The versions of the paper that follow are the versions that were submitted during the peer review process. They are not the versions of record or the final published versions. They should not be cited or distributed as the published version of this manuscript.

BMJ Open is an open access journal and the full, final, typeset and author-corrected version of record of the manuscript is available on our site with no access controls, subscription charges or pay-per-view fees (<http://bmjopen.bmj.com>).

If you have any questions on BMJ Open's open peer review process please email [info.bmjopen@bmj.com](mailto:info.bmjopen@bmj.com)

# BMJ Open

## Dabigatran initiation in patients with non-valvular AF and first acute ischemic stroke: an analysis from the SITS registry

|                               |                                                                                                                                                                                                                                                                                                                                                                                                                                                                                                                                                                                                                                                                                                                                                                                                                                                                                                                                                                                                                                                                                                                                                                                                                                                                                                                                                                                                                                                                                                                                                                                                                                                                                                                                                                                                                                                                                                                                                                                                                   |
|-------------------------------|-------------------------------------------------------------------------------------------------------------------------------------------------------------------------------------------------------------------------------------------------------------------------------------------------------------------------------------------------------------------------------------------------------------------------------------------------------------------------------------------------------------------------------------------------------------------------------------------------------------------------------------------------------------------------------------------------------------------------------------------------------------------------------------------------------------------------------------------------------------------------------------------------------------------------------------------------------------------------------------------------------------------------------------------------------------------------------------------------------------------------------------------------------------------------------------------------------------------------------------------------------------------------------------------------------------------------------------------------------------------------------------------------------------------------------------------------------------------------------------------------------------------------------------------------------------------------------------------------------------------------------------------------------------------------------------------------------------------------------------------------------------------------------------------------------------------------------------------------------------------------------------------------------------------------------------------------------------------------------------------------------------------|
| Journal:                      | <i>BMJ Open</i>                                                                                                                                                                                                                                                                                                                                                                                                                                                                                                                                                                                                                                                                                                                                                                                                                                                                                                                                                                                                                                                                                                                                                                                                                                                                                                                                                                                                                                                                                                                                                                                                                                                                                                                                                                                                                                                                                                                                                                                                   |
| Manuscript ID                 | bmjopen-2020-037234                                                                                                                                                                                                                                                                                                                                                                                                                                                                                                                                                                                                                                                                                                                                                                                                                                                                                                                                                                                                                                                                                                                                                                                                                                                                                                                                                                                                                                                                                                                                                                                                                                                                                                                                                                                                                                                                                                                                                                                               |
| Article Type:                 | Original research                                                                                                                                                                                                                                                                                                                                                                                                                                                                                                                                                                                                                                                                                                                                                                                                                                                                                                                                                                                                                                                                                                                                                                                                                                                                                                                                                                                                                                                                                                                                                                                                                                                                                                                                                                                                                                                                                                                                                                                                 |
| Date Submitted by the Author: | 24-Jan-2020                                                                                                                                                                                                                                                                                                                                                                                                                                                                                                                                                                                                                                                                                                                                                                                                                                                                                                                                                                                                                                                                                                                                                                                                                                                                                                                                                                                                                                                                                                                                                                                                                                                                                                                                                                                                                                                                                                                                                                                                       |
| Complete List of Authors:     | Escudero-Martinez, Irene; Hospital Universitario Virgen del Rocio, Neurology<br>Mazya, Michael; Department of Neurovascular Diseases, Karolinska University Hospital, Stockholm, Sweden.<br>Teutsch, Christine; Medical Department, TA Cardiometabolism and Metabolics, Boehringer Ingelheim International GmbH, Ingelheim, Germany<br>Lesko, Norbert; Department of Neurology, Faculty of Medicine, Pavol Jozef Šafárik University in Košice, Košice, Slovak Republic<br>Gdovinova, Zuzana; Department of Neurology, Faculty of Medicine, Pavol Jozef Šafárik University in Košice, Košice, Slovak Republic<br>Barbarini, Leonardo; Department of Neurology, Ospedale Vito Fazzi, Lecce, Italy<br>Fryze, Waldemar; Copernicus PI, M. Kopernik Hospital, Gdańsk, Poland<br>Karlinski, Michal ; Second Department of Neurology, Institute of Psychiatry and Neurology, Warsaw, Poland<br>Kobayashi, Adam; Faculty of Health Sciences and Physical Education, Kazimierz Pulaski University of Technology and Humanities<br>Krastev, Georgi ; Department of Neurology, Faculty Hospital Trnava, Trnava, Slovak Republic<br>Paiva Nunes, Ana; Stroke Unit, Centro Hospitalar Lisboa Central, Lisbon, Portugal<br>Pasztoova, Katarina; General Hospital, Komarno, Slovak Republic<br>Peeters, André; Department of Neurology, Cliniques Universitaires St-Luc, Brussels<br>Sobolewski, Piotr; The Faculty of Medicine and Health Sciences, Jan Kochanowski University, Kielce, Poland. Department of Neurology and Stroke Unit, Holy Spirit Specialist Hospital in Sandomierz, Poland<br>Vilionskis, Aleksandras; p. Clinic of Neurology and Neurosurgery, Institute of Clinical Medicine, Vilnius University. Stroke Center, Republican Vilnius University Hospital, Vilnius, Lithuania<br>Toni, Danilo; Department of Human Neurosciences, Sapienza University of Rome, Policlinico Umberto I, Rome, Italy<br>Ahmed, Niazi; Department of Neurovascular Diseases, Karolinska University Hospital, Stockholm, Sweden. |
| Keywords:                     | Stroke < NEUROLOGY, Anticoagulation < HAEMATOLOGY, Adult cardiology < CARDIOLOGY                                                                                                                                                                                                                                                                                                                                                                                                                                                                                                                                                                                                                                                                                                                                                                                                                                                                                                                                                                                                                                                                                                                                                                                                                                                                                                                                                                                                                                                                                                                                                                                                                                                                                                                                                                                                                                                                                                                                  |

1  
2  
3  
4  
5  
6  
7  
8  
9  
10  
11  
12  
13  
14  
15  
16  
17  
18  
19  
20  
21  
22  
23  
24  
25  
26  
27  
28  
29  
30  
31  
32  
33  
34  
35  
36  
37  
38  
39  
40  
41  
42  
43  
44  
45  
46  
47  
48  
49  
50  
51  
52  
53  
54  
55  
56  
57  
58  
59  
60

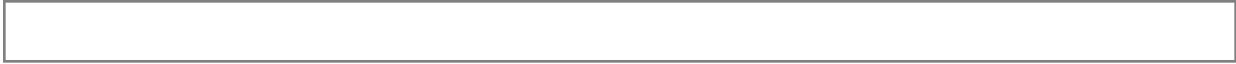

SCHOLARONE™  
Manuscripts

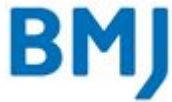

I, the Submitting Author has the right to grant and does grant on behalf of all authors of the Work (as defined in the below author licence), an exclusive licence and/or a non-exclusive licence for contributions from authors who are: i) UK Crown employees; ii) where BMJ has agreed a CC-BY licence shall apply, and/or iii) in accordance with the terms applicable for US Federal Government officers or employees acting as part of their official duties; on a worldwide, perpetual, irrevocable, royalty-free basis to BMJ Publishing Group Ltd ("BMJ") its licensees and where the relevant Journal is co-owned by BMJ to the co-owners of the Journal, to publish the Work in this journal and any other BMJ products and to exploit all rights, as set out in our [licence](#).

The Submitting Author accepts and understands that any supply made under these terms is made by BMJ to the Submitting Author unless you are acting as an employee on behalf of your employer or a postgraduate student of an affiliated institution which is paying any applicable article publishing charge ("APC") for Open Access articles. Where the Submitting Author wishes to make the Work available on an Open Access basis (and intends to pay the relevant APC), the terms of reuse of such Open Access shall be governed by a Creative Commons licence – details of these licences and which [Creative Commons](#) licence will apply to this Work are set out in our licence referred to above.

Other than as permitted in any relevant BMJ Author's Self Archiving Policies, I confirm this Work has not been accepted for publication elsewhere, is not being considered for publication elsewhere and does not duplicate material already published. I confirm all authors consent to publication of this Work and authorise the granting of this licence.

1  
2  
3 **Title: Dabigatran initiation in patients with non-valvular AF and first**  
4 **acute ischemic stroke: an analysis from the SITS registry**  
5  
6  
7  
8

9 **Authors:** Irene Escudero-Martínez MD<sup>a,b</sup>; Michael V. Mazya MD, PhD<sup>c,d</sup>; Christine  
10 Teutsch MD<sup>e</sup>; Norbert Lesko, MD<sup>f</sup>; Zuzana Gdovinova MD, PhD<sup>f</sup>; Leonardo Barbarini,  
11 MD<sup>g</sup>; Waldemar Fryze MD<sup>h</sup>; Michal Karlinski MD<sup>i</sup>, PhD; Adam Kobayashi MD, PhD<sup>j</sup>;  
12 Georgi Krastev MD<sup>k</sup>; Ana Paiva Nunes MD, PhD<sup>l</sup>; Katarina Pasztoova MD<sup>m</sup>; Andre  
13 Peeters MD, PhD<sup>n</sup>; Piotr Sobolewski MD, PhD<sup>o</sup>; Aleksandras Vilionskis MD, PhD<sup>p</sup>;  
14 Danilo Toni MD, PhD<sup>q</sup>; Niaz Ahmed MD, PhD<sup>c,d</sup>; on behalf of the SITS Investigators.  
15  
16  
17  
18  
19  
20

21 **Affiliation:**

- 22  
23 a. Department of Neurology, University Hospital Virgen del Rocío, Sevilla, Spain.  
24 b. Neurovascular Research Laboratory, Instituto de Biomedicina de Sevilla-IBiS.  
25 c. Department of Neurovascular Diseases, Karolinska University Hospital,  
26 Stockholm, Sweden.  
27  
28 d. Department of Clinical Neuroscience, Karolinska Institutet, Stockholm, Sweden.  
29  
30 e. Medical Department, TA Cardiometabolism and Metabolics, Boehringer  
31 Ingelheim International GmbH, Ingelheim, Germany  
32  
33 f. Department of Neurology, Faculty of Medicine, Pavol Jozef Šafárik University  
34 in Košice, Košice, Slovak Republic  
35  
36 g. Department of Neurology, Ospedale Vito Fazzi, Lecce, Italy  
37  
38 h. Copernicus Pl, M. Kopernik Hospital, Gdańsk, Poland  
39  
40 i. Second Department of Neurology, Institute of Psychiatry and Neurology,  
41 Warsaw, Poland  
42  
43 j. Faculty of Health Sciences and Physical Education, Kazimierz Pulaski  
44 University of Technology and Humanities  
45  
46 k. Department of Neurology, Faculty Hospital Trnava, Trnava, Slovak Republic  
47  
48 l. Stroke Unit, Centro Hospitalar Lisboa Central, Lisbon, Portugal  
49  
50 m. General Hospital, Komarno, Slovak Republic  
51  
52 n. Department of Neurology, Cliniques Universitaires St-Luc, Brussels  
53  
54 o. The Faculty of Medicine and Health Sciences, Jan Kochanowski University,  
55 Kielce, Poland. Department of Neurology and Stroke Unit, Holy Spirit  
56  
57 Specialist Hospital in Sandomierz, Poland  
58  
59  
60

- 1  
2  
3 p. Clinic of Neurology and Neurosurgery, Institute of Clinical Medicine, Vilnius  
4 University. Stroke Center, Republican Vilnius University Hospital, Vilnius,  
5 Lithuania  
6  
7  
8 q. Department of Human Neurosciences, Sapienza University of Rome, Policlinico  
9 Umberto I, Rome, Italy  
10  
11  
12

13 **Corresponding author:**

14 Assoc. Prof. Niaz Ahmed, MD, PhD

15 Department of Neurovascular Diseases, R2:O3

16 Karolinska University Hospital

17 SE-171 76 Stockholm, Sweden

18 Telephone: +46 709720277

19 E-mail: niaz.ahmed@sll.se  
20  
21  
22  
23  
24  
25  
26  
27  
28  
29  
30  
31  
32  
33  
34  
35  
36  
37  
38  
39  
40  
41  
42  
43  
44  
45  
46  
47  
48  
49  
50  
51  
52  
53  
54  
55  
56  
57  
58  
59  
60

## ABSTRACT

**Background and objective:** The optimal timing for initiation of dabigatran after acute ischemic stroke (AIS) is not established. We aimed to evaluate initiation timing and clinical outcomes of dabigatran in AIS patients with non-valvular atrial fibrillation (NVAF).

**Design:** We analyzed patients registered in SITS Thrombolysis and Thrombectomy Registry, (NCT03258645) from July 2014 to July 2018.

**Participants:** European NVAF patients ( $\geq 18$  years) hospitalized after first-ever ischemic stroke (index event).

**Setting:** A multinational, prospective, observational monitoring register.

**Intervention:** Dabigatran initiation within 3 months after the index event.

**Primary and secondary outcomes:** The primary outcome was time from index event to dabigatran initiation. Additional outcomes included physicians' reasons for delaying dabigatran initiation beyond acute hospital discharge and outcomes within 3 months of index event.

**Methods:** We identified patients with NVAF that received Dabigatran within 3 months of index. We

**Results:** In total, 1489 patients with NVAF received dabigatran after AIS and of these 1240 patients had available initiation time. At baseline, median age was 75 years; 53% of patients were female, 15% were receiving an oral anticoagulant, 29% acetylsalicylic acid, and 4% clopidogrel. Most patients (82%) initiated dabigatran within 14 days after the index event. Patients initiating earlier had lower stroke severity: from median NIHSS 8 (IQR 6-13) if initiated within 7 days, to NIHSS 15 (9-19) if initiated between 28 days and 3 months. Most common reasons for delaying initiation were hemorrhagic transformation or intracranial hemorrhage, stroke severity, and infarct size. Few thrombotic/hemorrhagic events occurred within 3 months post-index event (20 of 926 patients, 2.2% with available data).

1  
2  
3 **Conclusions:** Our findings, together with previous observational studies, indicate that  
4 dabigatran initiated within the first days after AIS is safe, also in patients treated with  
5 intravenous thrombolysis, endovascular thrombectomy or both.  
6  
7  
8  
9

10 **Strengths and limitations of this study:**

- 11 • This study shows real-world clinical practice in a wide range of centers and  
12 countries.  
13
- 14 • To our knowledge, this is the first study of dabigatran for secondary stroke  
15 prevention in patients treated with reperfusion therapies.  
16
- 17 • The study is observational and based on a retrospective analysis of an ongoing  
18 database, with all the limitations of this type of study design.  
19
- 20 • Another major limitation is that we are only reporting cases deemed by  
21 participating clinicians to be eligible for OAC for secondary prevention  
22  
23  
24  
25  
26  
27

28 **Keywords:** ischemic stroke, atrial fibrillation, prevention, anticoagulation.  
29  
30  
31  
32  
33  
34  
35  
36  
37  
38  
39  
40  
41  
42  
43  
44  
45  
46  
47  
48  
49  
50  
51  
52  
53  
54  
55  
56  
57  
58  
59  
60



## INTRODUCTION

Cardioembolic stroke, the most severe ischemic stroke subtype, related mostly to NVAF accounts for 13% to 26% of all ischemic strokes.<sup>1</sup> Its recurrence rate within the first 14 days without anticoagulation is around 5%.<sup>2</sup> Anticoagulation using heparin decreases the risk of ischemic stroke recurrence to 3.0%, but at the cost of 1.8% increase risk of the absolute risk of intracranial bleeding.<sup>3</sup> Meanwhile, the rate of ischemic stroke recurrence may decrease to as low as 2.8% within 90 days when a direct oral anticoagulant (DOAC) is prescribed.<sup>4</sup> For clinicians, the decision of when to initiate anticoagulation after an acute ischemic stroke (AIS) is still a challenge, mainly due to perceived risk of early intracerebral hemorrhage.

The latest Cochrane systematic review in 2015 concluded that early anticoagulant therapy is not associated with net short- or long-term benefit in patients with AIS.<sup>5</sup> Moreover, neither national nor international stroke guidelines give firm recommendations. The AHA-ASA 2018 guidelines state that starting oral anticoagulation (OAC) within 4-14 days after AIS is reasonable for most patients, and the European Society of Cardiology (ESC) 2016 and European Heart Rhythm Association (EHRA) 2018 guidelines, endorsed by the European Stroke Organisation (ESO), recommend starting OAC 1, 3, 6 and 12 days, respectively, after transient ischemic attack, minor, moderate and severe strokes.<sup>6, 7, 8</sup>

Clinical practice is therefore to delay anticoagulation by up to 14 days. As the risk of recurrence during this time is around 5%, many clinicians anticoagulate earlier, guided by the approximate size of the infarct and absence or presence of any hemorrhagic transformation.

The lower overall risk of intracranial hemorrhage with DOACs compared to vitamin K antagonists (VKA) may facilitate earlier anticoagulation using DOACs in these patients.<sup>9</sup> Recent observational studies indicate that the risk of symptomatic intracranial hemorrhage (SICH) in patients treated with DOACs within the first 5 days of ischemic stroke is low.<sup>10,11,12</sup> A pooled individual patient data analysis of 7 observational studies concluded that DOACs started early after AIS were associated with reduced risk of poor clinical outcomes compared with VKA, mainly due to lower risk of ICH.<sup>13</sup>

1  
2  
3 Regarding dabigatran, patients were randomized to RE-LY trial no sooner than 14 days  
4 after AIS.<sup>14</sup> More recently, a smaller trial including 301 patients with TIA or minor  
5 ischemic stroke (NIHSS < 9) showed that dabigatran and aspirin had similar safety,  
6 with a non-significant trend for fewer early recurrent ischemic strokes in the dabigatran  
7 arm.<sup>15,16</sup>

8  
9  
10  
11 The primary aim of this observational study was to evaluate the timing of dabigatran  
12 initiation in acute ischemic stroke patients with NVAf treated with IV thrombolysis,  
13 mechanical thrombectomy, or both. Secondary aims were: (1) to report physicians'  
14 reasons to delay OAC and (2) to evaluate clinical outcomes at 3 month follow-up.  
15  
16  
17  
18  
19

## 20 MATERIAL AND METHODS

21  
22  
23 Patients presenting with first ever acute ischemic stroke and NVAf recorded in the  
24 SITS-AF registry between July 2014 and July 2018 were included.

25  
26 The SITS-AF registry is a subset of the SITS-ISTR, an ongoing, prospective, academic-  
27 driven, multinational, register for clinical centers treating patients with acute stroke. The  
28 methodology of the SITS-ISTR, including procedures for data collection and  
29 management, patient identification and verification of source data, has been described  
30 previously.<sup>17</sup>  
31  
32  
33  
34  
35  
36

37  
38 In the present study, patients were included if they presented with stroke symptoms and  
39 were treated with intravenous alteplase (Actilyse, Boehringer Ingelheim, Germany)  
40 within or outside license criteria, and/or with endovascular thrombectomy. Data  
41 collection in this study was done under the umbrella of SITS-MOST II study which was  
42 approved by the Stockholm Ethics committee. Need for ethical approval or patient  
43 consent for participation in the SITS-ISTR varied among participating countries. Ethics  
44 approval and patient consent were obtained in countries that required this; other  
45 countries approved the register for conduct as an anonymized audit.  
46  
47  
48  
49  
50  
51

52  
53 We collected baseline and demographic characteristics, premorbid modified Rankin  
54 Scale (mRS), variables required for CHA<sub>2</sub>DS<sub>2</sub>-VASc and HAS-BLED scores, stroke  
55 severity per the NIHSS, medication history, imaging data at admission and follow up,  
56 time interval in days between index event and start of dabigatran and physicians'  
57 reasons for delaying dabigatran initiation beyond acute hospital discharge. Follow-up  
58  
59  
60

1  
2  
3 period for this study was 3 months during which we collected information on any new  
4 clinical events, functional outcome using the mRS and death. All assessments of  
5 imaging studies, neurological, and functional status were done according to clinical  
6 routine at centers participating in the SITS-ISTR.  
7  
8  
9

## 10 11 **Outcomes**

12 The primary outcome was the time from index event to dabigatran initiation. Additional  
13 outcomes included physicians' reasons for delaying dabigatran initiation beyond acute  
14 hospital discharge, and clinical outcomes within 3 months of index event. The timing of  
15 initiation was at the discretion of the treating physicians. The clinical outcomes were  
16 stroke or systemic embolism, ICH or major bleeding defined according to the  
17 International Society on Thrombosis and Hemostasis, all within 3 months after the  
18 index event.<sup>18</sup>  
19  
20  
21  
22  
23  
24  
25

## 26 27 **Statistical analysis**

28 We performed descriptive statistics for baseline, imaging, and demographic data. For  
29 continuous variables, median and interquartile range values were obtained. For  
30 categorical variables, we calculated percentage proportions by dividing the number of  
31 events by the total number of patients, excluding missing or unknown cases.<sup>16</sup>  
32 Comparisons were made using Mann–Whitney U test and  $\chi^2$  test, as appropriate.  
33 Pearson correlation coefficient was used to correlate dabigatran initiation time with  
34 continuous variables. A multivariable regression model including potential confounders  
35 was used to establish association between baseline variables and dabigatran initiation  
36 time. Because of the low number of events, no inferential analysis was performed. To  
37 calculate incidence rates we used the number of patient-years (number of included  
38 patients multiplied by the follow-up time in years).  
39  
40  
41  
42  
43  
44  
45  
46  
47  
48

## 49 50 **Patient and Public Involvement**

51 Patients or the public WERE NOT involved in the design, or conduct, or reporting, or  
52 dissemination plans of our research  
53  
54  
55  
56  
57  
58  
59  
60

## RESULTS

The dataset comprised 14695 patients with first-ever AIS and NVAf, diagnosed either pre-stroke or within 3 months after the event. Of these, 1489 patients received dabigatran treatment for secondary prevention. Information regarding dabigatran initiation timing was available in 1240 patients, who were the study population for primary outcome (figure 1). Baseline and demographic characteristics in aggregate are presented in table 1. Baseline characteristics according to time of dabigatran initiation are presented in Supplementary Tables 1. Median age was 75 (69-82) years, 656 (53%) patients were female. Median NIHSS at admission was 10 (6-16). The median time from index stroke to dabigatran initiation was 8 (4-12) days. About 82% of patients initiated dabigatran within 14 days after the index stroke (supplementary figure 1).

Univariate analysis showed that higher NIHSS score at baseline and higher pre-stroke mRS were associated with a delay of dabigatran initiation ( $p < 0.001$  and  $0.01$  respectively). Multivariate regression analysis showed that older age ( $p = 0.02$ ), higher diastolic blood pressure at admission ( $p = 0.002$ ), higher previous CHA<sub>2</sub>DS<sub>2</sub>-VAsC score ( $p = 0.04$ ) and a history of or predisposition to bleeding ( $p = 0.03$ ) were independently associated with a delay of dabigatran initiation.

### Reasons for delaying anticoagulation

Regarding reasons for delaying dabigatran initiation beyond the period of acute hospitalization, a total of 268 reasons were reported in 203 patients (one reason in 160 patients, more than one in 43). Table 2 shows the distribution of physician responses. Of all reasons given, 65.3% were related to the index event, the most frequent being stroke severity (22.8%), size of infarct (19.4%) and hemorrhagic transformation (14.9%).

### Follow-up

In total, 926 patients had available information at 3 month follow-up regarding clinical events since discharge, resulting in a cumulative follow-up time of 231.5 patient-years. Of these, in 702 patients information about dabigatran initiation time was available. Among 926 patients, 101 experienced at least one event, with a total of 107 events reported. Of these, 20 (2.2%) were considered events of interest (embolism or

1  
2  
3 hemorrhage, defined as new stroke, myocardial infarct, pulmonary embolism or  
4 systemic embolism, as well as intracranial hemorrhage, and major extracranial  
5 hemorrhage). 13 of these events were embolic/ischemic (7 new stroke since discharge  
6 [3.02%/y], 3 myocardial infarction, 2 pulmonary embolism and 1 systemic embolism)  
7 and 7 were hemorrhagic (1 intracranial hemorrhage [0.43%/y] and 6 major extracranial  
8 hemorrhage). There were no differences in the distribution of events of interest and  
9 initiation time.

10 Data on mRS at 3 months after the index event were available in 1018 patients. A total  
11 of 697 patients (68.5%) were functionally independent (mRS 0-2), and 31 (3%) had  
12 died.  
13

## 14 15 16 17 18 19 20 21 22 **DISCUSSION**

23  
24  
25 This large observational study shows that dabigatran in clinical practice is most  
26 commonly initiated early (82% patients within first 14 days) after an AIS. The rate of  
27 ischemic or hemorrhagic complications during the first three months after early  
28 initiation of dabigatran is low.  
29

30  
31 Our findings suggest that the safety profile of dabigatran for secondary stroke  
32 prevention in clinical practice is similar to the findings in the RE-LY trial.<sup>14</sup>  
33  
34

35  
36  
37 We have compared our results with those in recently published observational studies  
38 (tables 3 & 4). At a median age of 76, the patients in our series were older than in other  
39 studies, with the exception of the NOACISP.<sup>10,11,12,19</sup> Importantly, our patients had a  
40 much higher stroke severity than those in previous publications due to the fact that they  
41 received intravenous and/or endovascular reperfusion therapies, with an expectedly  
42 higher median NIHSS score, (median NIHSS 10 in our patients vs. 2 – 7 in previous  
43 observational studies).<sup>10,11,12,19</sup> The higher NIHSS score and older age had likely a major  
44 influence on our finding that dabigatran was initiated at median 8 days, compared to 2-4  
45 days in previous studies.<sup>10,11,19</sup> Both stroke severity, and reperfusion treatment, are  
46 associated with an elevated hemorrhagic risk. In spite of this, the rate of large  
47 parenchymal hematoma (PH2-PHr2) in our study was 1% compared to 2.7% to 5.1%  
48 previously reported in IVT patients and the rate of ICH within 3 months from index  
49 event was even lower, at 0.1%, compared to 5.1% at 90 days in a meta-analysis of  
50 endovascular thrombectomy (EVT).<sup>20,21,22</sup> However, these findings should be interpreted  
51  
52  
53  
54  
55  
56  
57  
58  
59  
60

1  
2  
3 with caution due to potential selection bias, as patients with early severe symptomatic  
4 bleeding after acute treatment may have died, or if alive, may have been too severely  
5 disabled to be considered for OAC initiation – potentially removing bleeding-prone  
6 patients from the treatment-eligible population.  
7  
8  
9

10  
11 According to the RAF-NOAC study, the period of DOAC initiation with the lowest  
12 rates of ischemic recurrence and major bleeding events would be 3 to 14 days after the  
13 index event (2.1% for composite AIS, TIA, symptomatic systematic embolism and  
14 major bleeding).<sup>12</sup> Although our numbers of events were too low for significance testing  
15 between periods, the period with the lowest rate of safety events was 3-7 days after AIS  
16 (1.7% for composite AIS, TIA, symptomatic systematic embolism and major bleeding).  
17 When comparing safety events in our study and the dabigatran subgroup of RAF-  
18 NOAC, the rate of the composite outcome is similar (2.2% vs 2.4%), but in our series  
19 the rates of stroke or TIA and ICH were lower.  
20  
21  
22  
23  
24  
25  
26  
27  
28

29 We further described physicians' reasons to delay anticoagulation. Previous registry  
30 studies have shown an underutilization of OAC both in primary prevention and in  
31 patients after AIS.<sup>23,24,25</sup> Several reasons might explain this: lack of knowledge of  
32 current guidelines, physician concern for the risk of bleeding, and clinical factors, such  
33 as poor functional outcome after stroke, advanced age or the risk of falling. In our  
34 study, physicians' reasons for the delay of dabigatran initiation were mostly related to  
35 the index event and its putative high hemorrhagic risk.<sup>26</sup>  
36  
37  
38  
39  
40  
41  
42

43 Our study has some limitations. The main one is that our series only includes patients  
44 treated with IVT and/or endovascular thrombectomy. Thus, there is a matter of selection  
45 of cases eligible for such therapies (whether treated on- or off-label and within or  
46 outside guidelines). These cases are likely to have more severe strokes, may have a  
47 lower pre-morbid score on mRS and other differences, compared to an unselected  
48 NVAf stroke population. Another limitation is that on 16% of patients initiating  
49 dabigatran within 3 months from index event there was no available information on  
50 exact initiation timing. A sensitivity analysis (supplementary table II) comparing  
51 clinical characteristics between patients with and without initiation timing showed that  
52 the latter group had higher NIHSS scores and glucose levels at baseline, less frequent  
53 history of previous AF and more frequently had endovascular treatment. These  
54  
55  
56  
57  
58  
59  
60

1  
2  
3 differences could potentially have biased our findings to some extent in the direction of  
4 earlier dabigatran initiation.  
5

6 Moreover, we are only reporting cases deemed by participating clinicians to be eligible  
7 for OAC for secondary prevention. In 4 cases of events of interest, information about  
8 dabigatran initiation timing was not available, but sensitivity analysis has been  
9 performed under different distribution assumptions and showed non-statistical  
10 significance regarding time initiation groups.  
11  
12  
13  
14  
15

16  
17 The strengths of our study are that it shows real-world clinical practice in a wide range  
18 of centers and countries, in which the timing of OAC was not standardized across the  
19 study but left to the discretion of the individual physicians and centers. It is also, to our  
20 knowledge, the first study of dabigatran for secondary stroke prevention in patients  
21 treated with IVT and or EVT, a population in which there may be even more  
22 controversy about when to start OAC due to a potentially elevated risk of hemorrhage.  
23 In addition, our data add important safety information on dabigatran, as the population  
24 in this study was not included in the pivotal dabigatran trial RE-LY (patients with a  
25 recent acute stroke were excluded).  
26  
27  
28  
29  
30  
31  
32

33  
34 Four large randomized controlled trials, OPTIMAS (EudraCT, 2018-003859-38; UK),  
35 TIMING (NCT02961348; Sweden), START (NCT03021928; USA) and ELAN  
36 (NCT03148457; Switzerland), are investigating the benefit of early DOAC  
37 administration in patients with AF-related ischemic stroke. The results of these trials are  
38 expected in the coming years; in the meantime, clinicians have to rely on data from  
39 observational studies.  
40  
41  
42  
43  
44  
45

## 46 **Conclusions**

47 Our findings, together with previous observational studies, suggest that dabigatran  
48 initiated within the first days after AIS is safe in patients treated with intravenous  
49 thrombolysis, endovascular thrombectomy, or both.  
50  
51  
52  
53

## 54 **ACKNOWLEDGEMENT**

55 The authors would like to thank the SITS-Registry Investigators and patients.  
56  
57  
58  
59

## 60 **SOURCES OF FUNDING**

1  
2  
3 This study is sponsored by Boehringer-Ingelheim. In addition, the SITS registry is  
4 financed directly and indirectly by grants from Karolinska Institutet, Stockholm County  
5 Council, the Swedish Heart-Lung Foundation, the Swedish Order of St. John, Friends of  
6 Karolinska Institutet, and private donors, as well as from an unrestricted sponsorship  
7 from Boehringer-Ingelheim. SITS has previously received grants from the European  
8 Union Framework 7, the European Union Public Health Authority and Ferrer  
9 International, EVER Pharma. SITS is currently conducting studies supported by  
10 Boehringer-Ingelheim as well as in collaboration with Karolinska Institutet, supported  
11 by Stryker, Covidien and Phenox.

12 Irene Escudero-Martínez has received a grant from “Fundación Progreso y Salud, Junta  
13 de Andalucía” (grant EF-0437-2018).

### 24 **ETHICAL APPROVAL**

25 Data collection in this study was done under the umbrella of SITS-MOST II study  
26 which was approved by the Stockholm Ethics committee.

27  
28  
29  
30 **DATA SHARING STATEMENT:** All data relevant to the study are included in the  
31 article or uploaded as supplementary.

### 35 **CONFLICT OF INTEREST / DISCLOSURES**

36 Niaz Ahmed is chair of SITS International, which receives a grant from Boehringer  
37 Ingelheim for the SITS-ISTR.

38 Michael Mazya is International Network and Research Executive at SITS International,  
39 which receives a grant from Boehringer Ingelheim for the SITS-ISTR.

### 45 **CONTRIBUTORSHIP**

46 MM and NA were involved in protocol development. MM and IEM were involved in  
47 data analysis. IEM and NA wrote the first draft of the manuscript. All authors reviewed  
48 and edited the manuscript and approved the final version of the manuscript.

### 53 **REFERENCES**

54  
55  
56  
57  
58 <sup>1</sup> Seiffge D, Werring DJ, Paciaroni M, Dawson J, Warach S, Milling TJ et al. Timing of  
59 anticoagulation after recent ischaemic stroke in patients with atrial fibrillation. *Lancet*  
60 *Neurol* 2019;18:117-126.



1  
2  
3  
4  
5  
6  
7  
8  
9  
10  
11  
12  
13  
14  
15  
16  
17  
18  
19  
20  
21  
22  
23  
24  
25  
26  
27  
28  
29  
30  
31  
32  
33  
34  
35  
36  
37  
38  
39  
40  
41  
42  
43  
44  
45  
46  
47  
48  
49  
50  
51  
52  
53  
54  
55  
56  
57  
58  
59  
60

---

<sup>2</sup> Saxena R, Lewis S, Berge E, Sandercock PAG, Koudstaal PJ for the IST Collaborative Group. Risk of early death and recurrent stroke and effect of heparin in 3169 patients with acute ischemic stroke and atrial fibrillation in the International Stroke Trial. *Stroke* 2001;32:2333-2337.

<sup>3</sup> Paciaroni M, Agnelli G, Micheli S, Caso V. Efficacy and safety of anticoagulant treatment in acute cardioembolic stroke: a meta-analysis of randomized controlled trials. *Stroke*. 2007;38:423–430.

<sup>4</sup> Paciaroni M, Agnelli G, Falocci N, et al. Early recurrence and major bleeding in patients with acute ischemic stroke and atrial fibrillation treated with non-vitamin-K oral anticoagulants (RAF-NOACs) study. *J Am Heart Assoc* 2017; 6: e007034.

<sup>5</sup> Sandercock PA, Counsell C, Kane EJ. Anticoagulants for acute ischaemic stroke. *Cochrane Database Syst Rev*. 2015;3:CD000024. DOI:10.1002/14651858.CD000024.pub4.

<sup>6</sup> Powers WJ, Rabinstein AA, Ackerson T, et al. 2018 Guidelines for the early management of patients with acute ischemic stroke: a guideline for healthcare professionals from the American Heart Association/American Stroke Association. *Stroke* 2018;49(3):e46-e110.

<sup>7</sup> Kirchhof P, Benussi S, Kotecha D, Ahlsson A, Atar D, Casadei B et al. 2016 ESC Guidelines for the management of atrial fibrillation developed in collaboration with EACTS: the Task Force for the management of atrial fibrillation of the European Society of Cardiology (ESC). Developed with the special contribution of the European Heart Rhythm Association (EHRA) of the ESC: endorsed by the European Stroke Organisation (ESO). *Eur Heart J* 2016;37:2893–2962.

<sup>8</sup> Steffel J, Verhamme P, Potpara TS, Albaladejo P, Antz M, Desteghe L et al. The 2018 European Heart Rhythm Association Practical Guide on the use of non-vitamin K antagonist oral anticoagulants in patients with atrial fibrillation: executive summary. *Eur Heart Journal* 2018;39:1330-1393.

<sup>9</sup> Ntaios G, Papavasileiou V, Diener HC, Makaritsis K, Michel P. Nonvitamin-K-Antagonist oral anticoagulants in patients with atrial fibrillation and previous stroke or transient ischemic attack. A systematic review and meta-analysis of randomized controlled trials. *Stroke*. 2012;43:3298-3304.

<sup>10</sup> Seiffge DJ, Traenka C, Polymeris A, Hert L, Peters N, Lyrer P et al. Early start of DOAC after ischemic stroke: risk of intracranial hemorrhage and recurrent events. *Neurology* 2016;87:1856-1862.

<sup>11</sup> Arihiro S, Todo K, Koga M, Furui E, Kinoshita N, Kimura K et al. Three-month risk-benefit profile of anticoagulation after stroke with atrial fibrillation: the SAMURAI-Nonvalvular Atrial Fibrillation (NVAf) study. *Int J Stroke* 2016;11:565-574.

- 1  
2  
3  
4  
5  
6  
7  
8  
9
- 
- 12 Paciaroni M, Agnelli G, Falocci N, Tsivgoulis G, Vadikolias K, Liantinioti C et al. Early recurrence and major bleeding in patients with acute ischemic stroke and atrial fibrillation treated with non-vitamin-K oral anticoagulants (RAF-NOACs) study. *J Am Heart Assoc* 2017;6:e007034.
- 13 Seiffge DJ, Paciaroni M, Wilson D, Koga M, Macha K, Cappellari M et al. DOAC vs VKA after recent ischemic stroke in patients with atrial fibrillation. *Ann Neurol* 2019;13. Doi:10.1002/ana.25498
- 14 Diener HC, Connolly SJ, Ezekowitz MD, Wallentin L, Reilly PA, Yang S et al. Dabigatran compared with warfarin in patients with atrial fibrillation and previous transient ischaemic attack or stroke: a subgroup analysis of the RE-LY trial. *Lancet Neurol* 2010;9:1157–1163.
- 15 Ng KH, Sharma M, Benavente O, et al. Dabigatran following acute transient ischemic attack and minor stroke II (DATAS II). *Int J Stroke* 2017; 12: 910–914.
- 16 Butcher K, Ng K, Field T. The dabigatran following acute transient ischemic attack and minor stroke trial: final results. *Eur Stroke J* 2018; 3 (suppl 1): 3 (abstr).
- 17 Wahlgren N, Ahmed N, Dávalos A, Ford GA, Grond M, Hacke W, et al; SITS-MOST investigators. Thrombolysis with alteplase for acute ischaemic stroke in the Safe Implementation of Thrombolysis in Stroke- Monitoring Study (SITS-MOST): an observational study. *Lancet*. 2007;369:275–282.
- 18 Schulman S, Kearon C, on behalf on the subcommittee on control of anticoagulation of the scientific and standardization committee of the international society on thrombosis and haemostasis. Definition of major bleeding in clinical investigations of antihemostatic medicinal products in non-surgical patients. *Journal of Thrombosis and Haemostasis*. 2005;3:692-694.
- 19 Gioia LC, Kate M, Sivakumar L et al. Early Rivaroxaban use after cardioemboli stroke may not result in hemorrhagic transformation: a prospective MRI study. *Stroke* 2016;47:1917-1919.
- 20 Emberson J, Lees KR, Lyden P, Blackwell L, Albers G, Bluhmki E et al. for the Stroke Thrombolysis Trialists' Collaborative Group. Effect of treatment delay, age, and stroke severity on the effects of intravenous thrombolysis with alteplase for acute ischaemic stroke: a meta-analysis of individual patient data from randomised trials. *Lancet* 2014;384:1929-1935.
- 21 Mazya M, Lees KR, Collas D, Rand VM, Mikulik R, Toni D et al. IV thrombolysis in very severe and severe ischemic stroke: Results from the SITS-ISTR Registry. *Neurology* 2015;85:2098-2106.
- 22 Goyal M, Menon BK, van Zwam WH, Dippel DWJ, Mitchell PJ, Demchuk AM et al. Endovascular thrombectomy after large-vessel ischaemic stroke: a meta-analysis of individual patient data from five randomised trials. *Lancet* 2016;387:1723–1731.
- 55  
56  
57  
58  
59  
60

1  
2  
3  
4 23 Mazurek M, Shantsila E, Lane DA, et al. Guideline-Adherent Antithrombotic  
5 Treatment Improves Outcomes in Patients With Atrial Fibrillation: Insights From the  
6 Community-Based Darlington Atrial Fibrillation Registry. *Mayo Clin Proc*  
7 2017;92:1203–1213.  
8

9  
10 24 Gundlund A, Xian Y, Peterson ED, Butt JH, Gadsbøll K, Olesen JB et al. Prestroke  
11 and poststroke antithrombotic therapy in patients with atrial fibrillation: results from a  
12 nationwide cohort. *JAMA Netw Open* 2018;1:1-12.  
13

14 25 Groot AE, Vermeji J-D M, Westendorp WF, Nederkoorn PJ, van de Beck D,  
15 Coutinho J. Continuation or Discontinuation of Anticoagulation in the Early Phase  
16 After Acute Ischemic Stroke. *Stroke* 2018;49:1762-1765.  
17

18  
19 26 Álvarez-Sabin J, Maisterra O, Santamaría E, Kase CS. Factors influencing  
20 haemorrhagic transformation in ischaemic stroke. *Lancet Neurol* 2013; 12: 689–705.  
21  
22

### 23 24 25 **Figure legend**

26  
27 Figure 1. Flowchart of the study.  
28  
29  
30  
31  
32  
33  
34  
35  
36  
37  
38  
39  
40  
41  
42  
43  
44  
45  
46  
47  
48  
49  
50  
51  
52  
53  
54  
55  
56  
57  
58  
59  
60

## Tables

|                                                   | Dabigatran patients with available time of initiation<br>N = 1240 |
|---------------------------------------------------|-------------------------------------------------------------------|
| Age (Mean, SD)<br>(Median, IQR)                   | 75 ± 10<br>(69-82)                                                |
| Gender<br>(N, %, Female)                          | 656 (52.9%)                                                       |
| NIHSS baseline<br>(Median, IQR)                   | 10 (6-16)                                                         |
| SBP<br>(mm Hg, Mean, SD)                          | 153 ± 23                                                          |
| DBP<br>(mm Hg, Mean, SD)                          | 85 ± 15                                                           |
| Glucose<br>(mmol/dl, Mean, SD)                    | 7.3 ± 2.3                                                         |
| Weight<br>(kg, Mean, SD)                          | 78 ± 15                                                           |
| Hypertension<br>(N, %)                            | 955 (77%)                                                         |
| Diabetes<br>(N, %)                                | 216 (17.4%)                                                       |
| Hyperlipidemia<br>(N, %)                          | 349 (28.1%)                                                       |
| Previous TIA<br>(N, %)                            | 65 (5.3%)                                                         |
| Current smoker<br>(N, %)                          | 88 (7.1%)                                                         |
| Previous smoker<br>(N, %)                         | 107 (8.8%)                                                        |
| Congestive heart failure<br>(N, %)                | 134 (10.9%)                                                       |
| Vascular disease<br>(N, %)                        | 149 (12%)                                                         |
| Renal impairment<br>(N, %)                        | 30 (2.6%)                                                         |
| Abnormal liver function<br>(N, %)                 | 16 (1.4%)                                                         |
| Alcohol use<br>(N, %)                             | 37 (3.2%)                                                         |
| History of / predisposition to bleeding<br>(N, %) | 30 (2.6%)                                                         |
| Labile INR<br>(N, %)                              | 39 (3.5%)                                                         |
| Previous AF<br>(N, %)                             | 720 (58.6%)                                                       |
| Previous mRS<br>(Median, IQR)                     | 0<br>(0-0)                                                        |
| Previous CHA2DS2-VASc (Mean)<br>(Median, IQR)     | 3.1<br>3 (2-4)                                                    |
| Previous HAS-BLED (Mean)<br>(Median, IQR)         | 1.7<br>1 (1-2)                                                    |
| CHA2DS2-VASc Discharge (Mean)<br>(Median, IQR)    | 5.1<br>5 (4-6)                                                    |
| HAS-BLED Discharge (Mean)<br>(Median, IQR)        | 2.7<br>3 (2-3)                                                    |
| IVT<br>(N, %)                                     | 1055 (85.1%)                                                      |
| EVT<br>(N, %)                                     | 68 (5.5%)                                                         |
| IVT+EVT<br>(N, %)                                 | 117 (9.4%)                                                        |

**Table 1. Baseline characteristics of dabigatran patients included in the study.**

---

| Reasons for delay                          | N          | Percent     |
|--------------------------------------------|------------|-------------|
| Severity of stroke                         | 61         | 22.8%       |
| Size of infarct                            | 52         | 19.4%       |
| Hemorrhagic transformation                 | 40         | 14.9%       |
| ICH                                        | 8          | 3.0%        |
| Reason not specified                       | 27         | 10.1%       |
| Patient bleeding risk factors              | 18         | 6.7%        |
| Location of infarct                        | 14         | 5.2%        |
| Practical considerations                   | 14         | 5.2%        |
| Intervention used to treat ischemic stroke | 8          | 3.0%        |
| Patient stroke risk factors                | 6          | 2.2%        |
| Recommendation from specialist             | 6          | 2.2%        |
| Altered coagulation parameters             | 5          | 1.9%        |
| Other reasons                              | 5          | 1.9%        |
| Patient preference                         | 4          | 1.5%        |
| <b>Total</b>                               | <b>268</b> | <b>100%</b> |

**Table 2. Distribution of physician reasons to delay dabigatran initiation until after discharge from acute stroke care.**

|                                             | <b>Dabigatran SITS</b> | NOACISP (all patients)      | Gioia et al <sup>19</sup>         | SAMURAI (NOACs) | RAF-NOAC (Dabigatran group) |
|---------------------------------------------|------------------------|-----------------------------|-----------------------------------|-----------------|-----------------------------|
|                                             | <b>N=1240</b>          | <b>N=204</b>                | <b>N=60</b>                       | <b>N=475</b>    | <b>N=381</b>                |
| Median/<br>Mean* age                        | <b>76 (69-82)</b>      | 79 (73-84)                  | 73.5 +/- 13.2*                    | 74.4 +/- 9.2*   | 73.6 +/- 9.9*               |
| Median/<br>Mean*<br>NIHSS<br>(at admission) | <b>10 (6-16)</b>       | 4 (2-8)                     | 2 (0-4) at Rivaroxaban initiation | 4 (1-13)        | 7.7 +/- 6.2*                |
| Median delay (days)                         | <b>8 (4-12)</b>        | 5 (3-11) (Dabigatran group) | 3 (1.5-6)                         | 4 (2-7)         | 8 (3-14)                    |

**Table 3. Comparison of our results with previous observational studies with NOACs with 90 days follow-up.**

---

|                                                | <b>Dabigatran<br/>(N=926)</b> | RAF-NOAC<br>(Dabigatran N=381) |
|------------------------------------------------|-------------------------------|--------------------------------|
| All safety events                              | <b>20 (2.2%)</b>              | 9 (2.4%)                       |
| <b>Embolism</b>                                | <b>13 (1.4%)</b>              | <b>7 (1.8%)</b>                |
| Stroke/TIA                                     | <b>7 (0.8%)</b>               | 7 (1.8%)                       |
| Other thromboembolic events<br>(MI, PE, or SE) | <b>6 (0.7%)</b>               | 0                              |
| <b>Major hemorrhage</b>                        | <b>7 (0.8%)</b>               | <b>2 (0.5%)</b>                |
| ICH                                            | <b>1 (0.1%)</b>               | 2 (0.5%)                       |

**Table 4. Comparison of our results with dabigatran patients from a previous observational study with 90 days follow-up.**

1  
2  
3  
4  
5  
6  
7  
8  
9  
10  
11  
12  
13  
14  
15  
16  
17  
18  
19  
20  
21  
22  
23  
24  
25  
26  
27  
28  
29  
30  
31  
32  
33  
34  
35  
36  
37  
38  
39  
40  
41  
42  
43  
44  
45  
46  
47  
48  
49  
50  
51  
52  
53  
54  
55  
56  
57  
58  
59  
60

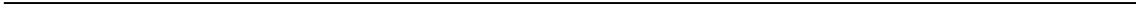

For peer review only



1  
2  
3  
4  
5  
6  
7  
8  
9  
10  
11  
12  
13  
14  
15  
16  
17  
18  
19  
20  
21  
22  
23  
24  
25  
26  
27  
28  
29  
30  
31  
32  
33  
34  
35  
36  
37  
38  
39  
40  
41  
42  
43  
44  
45  
46  
47  
48  
49  
50  
51  
52  
53  
54  
55  
56  
57  
58  
59  
60

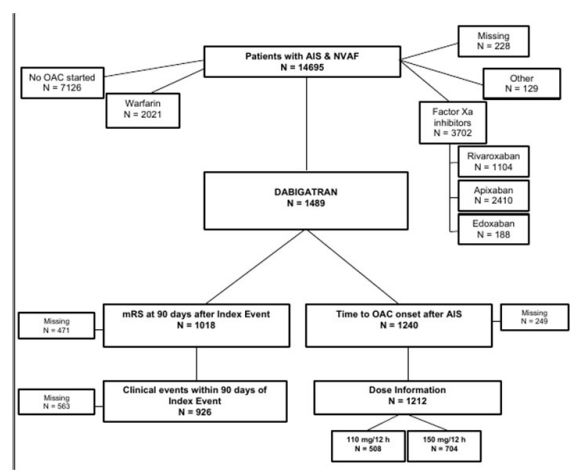

Figure 1. Flowchart of the study.

338x190mm (96 x 96 DPI)

|                                                        | < 24 h<br>n=73           | > 24 – 72 h<br>n=190     | > 3 – 7 d<br>n=344       | > 7 – 14 d<br>n=410      | > 14 – 28 d<br>n=174     | >28d – 3m<br>n=49              |
|--------------------------------------------------------|--------------------------|--------------------------|--------------------------|--------------------------|--------------------------|--------------------------------|
| Age (Mean, SD)<br>(Median, IQ)                         | 72 ± 11<br>(69-75)       | 74 ± 10<br>(73-76)       | 75 ± 9<br>(73-76)        | 75 ± 9<br>(74-77)        | 76 ± 9<br>(74-78)        | 77 ± 10<br>(73-80)             |
| Gender (N, %, Female)                                  | 29 (39.7%)               | 95 (50%)                 | 175 (50.9%)              | 225 (54.9%)              | 99 (56.9%)               | 33 (67.3%)                     |
| NIHSS baseline<br>(Median, IQ)                         | 8 (5-14)                 | 8 (5-14)                 | 8 (6-13)                 | 12 (7-17)                | 14 (10-18)               | 15 (9-19)                      |
| SBP<br>(mm Hg, Mean, SD)                               | 156 ± 22                 | 150 ± 21                 | 154 ± 22                 | 155 ± 23                 | 152 ± 22                 | 157 ± 29                       |
| DBP<br>(mm Hg, Mean, SD)                               | 87 ± 12                  | 83 ± 15                  | 84 ± 14                  | 85 ± 15                  | 85 ± 17                  | 91 ± 16                        |
| Glucose<br>(mmol/dl, Mean, SD)                         | 6.8 ± 1                  | 7.1 ± 3                  | 7.3 ± 2                  | 7.8 ± 3                  | 7.4 ± 2                  | 7.1 ± 2                        |
| Weight<br>(kg, Mean, SD)                               | 84 ± 16                  | 79 ± 15                  | 77 ± 15                  | 78 ± 15                  | 77 ± 16                  | 77 ± 17                        |
| Hypertension<br>(%)                                    | 75.3%                    | 77.9%                    | 74.9%                    | 79.9%                    | 76.3%                    | 77.6%                          |
| Diabetes<br>(%)                                        | 15.1%                    | 17.4%                    | 16.9%                    | 18.1%                    | 16.9%                    | 22.4%                          |
| Hyperlipidemia<br>(%)                                  | 29.6%                    | 33.5%                    | 25.5%                    | 34.4%                    | 21.9%                    | 26.5%                          |
| Previous TIA<br>(%)                                    | 5.5%                     | 6.8%                     | 6.2%                     | 3.4%                     | 5.8%                     | 6.1%                           |
| Current smoker<br>(%)                                  | 5.8%                     | 8.6%                     | 7.1%                     | 8.9%                     | 5.4%                     | 6.3%                           |
| Previous smoker<br>(%)                                 | 8.7%                     | 8.0%                     | 10.8%                    | 10.5%                    | 6.8%                     | 10.9%                          |
| Congestive heart failure<br>(%)                        | 12.3%                    | 7.4%                     | 8.7%                     | 13.2%                    | 11.6%                    | 14.3%                          |
| Vascular disease<br>(%)                                | 12.3%                    | 10.6%                    | 13.9%                    | 12.5%                    | 10.5%                    | 8.3%                           |
| Renal impairment<br>(%)                                | 2.0%                     | 2.8%                     | 2.1%                     | 3.5%                     | 1.2%                     | 2.2%                           |
| Abnormal liver function<br>(%)                         | 0.0%                     | 0.6%                     | 2.1%                     | 1.5%                     | 1.2%                     | 0.0%                           |
| Alcohol use<br>(%)                                     | 8.5%                     | 2.3%                     | 4.0%                     | 2.1%                     | 4.3%                     | 2.2%                           |
| History of / predisposition to bleeding<br>(%)         | 2.1%                     | 1.1%                     | 3.0%                     | 3.0%                     | 1.8%                     | 4.4%                           |
| Labile INR<br>(%)                                      | 0.0%                     | 4.8%                     | 3.1%                     | 2.7%                     | 5.8%                     | 4.5%                           |
| Previous AF<br>(%)                                     | 20.5%                    | 22.2%                    | 27.9%                    | 19.1%                    | 22.5%                    | 42.9%                          |
| Previous mRS<br>(Median, IQR)                          | 0<br>(0)                 | 0<br>(0)                 | 0<br>(0)                 | 0<br>(0)                 | 0<br>(0)                 | 0<br>(0-1)                     |
| Previous CHA2DS2-VASc<br>(Mean, 95%CI)<br>(Median, IQ) | 2.9 (2.5-3.2)<br>3 (1-5) | 3.2 (3-3.4)<br>3 (1-5)   | 3.2 (3-3.3)<br>3 (1-5)   | 3.2 (3.1-3.4)<br>3 (1-5) | 3.3 (3.-3.5)<br>3 (1-5)  | 3.4 (3.1-3.8)<br>3.5 (2.5-4.5) |
| Previous HAS-BLED<br>(Mean, 95%CI)<br>(Median, IQ)     | 1.1 (0.9-1.3)<br>1 (0-3) | 1.3 (1.2-1.3)<br>1 (0-2) | 1.2 (1.2-1.3)<br>1 (0-2) | 1.3 (1.2-1.4)<br>1 (0-1) | 1.2 (1-1.3)<br>1 (1-1)   | 1.2 (1.1-1.4)<br>1 (0-2)       |
| CHA2DS2-VASc<br>(Mean, 95%CI)<br>(Median, IQ)          | 4.7 (3.1-6.3)<br>5 (4-6) | 5 (3.7-6.3)<br>5 (4-6)   | 5 (3.6-6-4)<br>5 (4-6)   | 5.2 (3.8-6.6)<br>5 (4-6) | 5.2 (3.8-6.6)<br>5 (4-6) | 5.3 (4.2-6.4)<br>5 (4-6)       |
| HAS-BLED (Mean, 95%CI)<br>(Median, IQ)                 | 1.7 (0.9-2.5)<br>3 (2-3) | 1.7 (1-2.4)<br>3 (2-3)   | 1.7 (0.9-2.5)<br>3 (2-3) | 1.8 (1.1-2.5)<br>3 (2-3) | 1.7 (1-2.4)<br>3 (2-3)   | 1.8 (1.2-2.4)<br>3 (2-3)       |
| Signs of acute infarct<br>(N, %)                       | 11 (15.9%)               | 23 (14.5%)               | 33 (12%)                 | 36 (11.3%)               | 22 (15.9%)               | 3 (17.1%)                      |

**Supplementary Table I. Baseline characteristics according to time initiation.**

|                                                   | Dabigatran patients with available time of initiation<br>N = 1240 | Dabigatran patients NO timing information<br>N= 249 | P value |
|---------------------------------------------------|-------------------------------------------------------------------|-----------------------------------------------------|---------|
| Age (Mean, SD)<br>(Median, IQR)                   | 75 ± 10<br>(69-82)                                                | 74 ± 10<br>(69-80)                                  | 0.15    |
| Gender<br>(N, %, Female)                          | 656 (52.9%)                                                       | 132 (53%)                                           | 0.97    |
| NIHSS baseline<br>(Median, IQR)                   | 10 (6-16)                                                         | 14 (9-19)                                           | <0.001  |
| SBP<br>(mm Hg, Mean, SD)                          | 153 ± 23                                                          | 154 ± 25                                            | 0.31    |
| DBP<br>(mm Hg, Mean, SD)                          | 85 ± 15                                                           | 84 ± 14                                             | 0.23    |
| Glucose<br>(mmol/dl, Mean, SD)                    | 7.3 ± 2.3                                                         | 7.8 ± 5.1                                           | <0.001  |
| Weight<br>(kg, Mean, SD)                          | 78 ± 15                                                           | 77 ± 13                                             | 0.004   |
| Hypertension<br>(N, %)                            | 955 (77%)                                                         | 189 (75.9%)                                         | 0.63    |
| Diabetes<br>(N, %)                                | 216 (17.4%)                                                       | 48 (19.3%)                                          | 0.5     |
| Hyperlipidemia<br>(N, %)                          | 349 (28.1%)                                                       | 75 (30.1%)                                          | 0.04    |
| Previous TIA<br>(N, %)                            | 65 (5.3%)                                                         | 10 (4%)                                             | 0.48    |
| Current smoker<br>(N, %)                          | 88 (7.1%)                                                         | 15 (6%)                                             | 0.051   |
| Previous smoker<br>(N, %)                         | 107 (8.8%)                                                        | 30 (12.3%)                                          | 0.048   |
| Congestive heart failure<br>(N, %)                | 134 (10.9%)                                                       | 24 (9.6%)                                           | 0.57    |
| Vascular disease<br>(N, %)                        | 149 (12%)                                                         | 33 (13.3%)                                          | 0.6     |
| Renal impairment<br>(N, %)                        | 30 (2.6%)                                                         | 5 (2.4%)                                            | 0.88    |
| Abnormal liver function<br>(N, %)                 | 16 (1.4%)                                                         | 1 (0.5%)                                            | 0.5     |
| Alcohol use<br>(N, %)                             | 37 (3.2%)                                                         | 9 (4.3%)                                            | 0.44    |
| History of / predisposition to bleeding<br>(N, %) | 30 (2.6%)                                                         | 12 (5.7%)                                           | 0.02    |
| Labile INR<br>(N, %)                              | 39 (3.5%)                                                         | 5 (2.5%)                                            | 0.46    |
| Previous AF<br>(N, %)                             | 720 (58.6%)                                                       | 110 (44.4%)                                         | <0.001  |
| Previous mRS<br>(Median, IQR)                     | 0<br>(0-0)                                                        | 0<br>(0-0)                                          | 0.98    |
| Previous CHA2DS2-VASc (Mean)<br>(Median, IQR)     | 3.1<br>3 (2-4)                                                    | 3.1<br>3 (2-4)                                      | 0.31    |
| Previous HAS-BLED (Mean)<br>(Median, IQR)         | 1.7<br>1 (1-2)                                                    | 1.7<br>1 (1-2)                                      | 0.64    |
| CHA2DS2-VASc Discharge (Mean)<br>(Median, IQR)    | 5.1<br>5 (4-6)                                                    | 5.1<br>5 (4-6)                                      | 0.53    |
| HAS-BLED Discharge (Mean)<br>(Median, IQR)        | 2.7<br>3 (2-3)                                                    | 2.8<br>3 (2-3)                                      | 0.73    |
| IVT<br>(N, %)                                     | 1055 (85.1%)                                                      | 180 (72.3%)                                         | <0.001  |
| EVT<br>(N, %)                                     | 68 (5.5%)                                                         | 23 (9.2%)                                           | <0.001  |
| IVT+EVT<br>(N, %)                                 | 117 (9.4%)                                                        | 46 (18.5%)                                          | <0.001  |

**Supplementary Table II. Baseline characteristics of patients initiating dabigatran after the index event.**

1  
2  
3 **Legend Supplementary Figure 1. Histogram of initiation time periods, showing proportion of**  
4 **patients and median NIHSS at baseline for each group**  
5  
6  
7  
8  
9  
10  
11  
12  
13  
14  
15  
16  
17  
18  
19  
20  
21  
22  
23  
24  
25  
26  
27  
28  
29  
30  
31  
32  
33  
34  
35  
36  
37  
38  
39  
40  
41  
42  
43  
44  
45  
46  
47  
48  
49  
50  
51  
52  
53  
54  
55  
56  
57  
58  
59  
60

For peer review only

1  
2  
3  
4  
5  
6  
7  
8  
9  
10  
11  
12  
13  
14  
15  
16  
17  
18  
19  
20  
21  
22  
23  
24  
25  
26  
27  
28  
29  
30  
31  
32  
33  
34  
35  
36  
37  
38  
39  
40  
41  
42  
43  
44  
45  
46  
47  
48  
49  
50  
51  
52  
53  
54  
55  
56  
57  
58  
59  
60

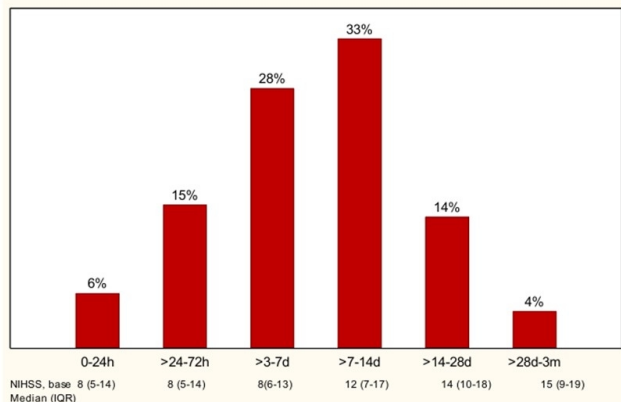

Legend Supplementary Figure 1. Histogram of initiation time periods, showing proportion of patients and median NIHSS at baseline for each group

338x190mm (96 x 96 DPI)

STROBE Statement—Checklist of items that should be included in reports of *cross-sectional studies*

|                              | Item No | Recommendation                                                                                                                                                                                    | Page No  |
|------------------------------|---------|---------------------------------------------------------------------------------------------------------------------------------------------------------------------------------------------------|----------|
| <b>Title and abstract</b>    | 1       | (a) Indicate the study's design with a commonly used term in the title or the abstract                                                                                                            | 3        |
|                              |         | (b) Provide in the abstract an informative and balanced summary of what was done and what was found                                                                                               | 3        |
| <b>Introduction</b>          |         |                                                                                                                                                                                                   |          |
| Background/rationale         | 2       | Explain the scientific background and rationale for the investigation being reported                                                                                                              | 5        |
| Objectives                   | 3       | State specific objectives, including any prespecified hypotheses                                                                                                                                  | 6        |
| <b>Methods</b>               |         |                                                                                                                                                                                                   |          |
| Study design                 | 4       | Present key elements of study design early in the paper                                                                                                                                           | 6        |
| Setting                      | 5       | Describe the setting, locations, and relevant dates, including periods of recruitment, exposure, follow-up, and data collection                                                                   | 6        |
| Participants                 | 6       | (a) Give the eligibility criteria, and the sources and methods of selection of participants                                                                                                       | 6        |
| Variables                    | 7       | Clearly define all outcomes, exposures, predictors, potential confounders, and effect modifiers. Give diagnostic criteria, if applicable                                                          | 7        |
| Data sources/<br>measurement | 8*      | For each variable of interest, give sources of data and details of methods of assessment (measurement). Describe comparability of assessment methods if there is more than one group              | 7        |
| Bias                         | 9       | Describe any efforts to address potential sources of bias                                                                                                                                         | 11       |
| Study size                   | 10      | Explain how the study size was arrived at                                                                                                                                                         | NA       |
| Quantitative variables       | 11      | Explain how quantitative variables were handled in the analyses. If applicable, describe which groupings were chosen and why                                                                      | 7        |
| Statistical methods          | 12      | (a) Describe all statistical methods, including those used to control for confounding                                                                                                             | 7        |
|                              |         | (b) Describe any methods used to examine subgroups and interactions                                                                                                                               | 7        |
|                              |         | (c) Explain how missing data were addressed                                                                                                                                                       | 7        |
|                              |         | (d) If applicable, describe analytical methods taking account of sampling strategy                                                                                                                | 7        |
|                              |         | (e) Describe any sensitivity analyses                                                                                                                                                             | 11       |
| <b>Results</b>               |         |                                                                                                                                                                                                   |          |
| Participants                 | 13*     | (a) Report numbers of individuals at each stage of study—eg numbers potentially eligible, examined for eligibility, confirmed eligible, included in the study, completing follow-up, and analysed | 8        |
|                              |         | (b) Give reasons for non-participation at each stage                                                                                                                                              | Figure 1 |
|                              |         | (c) Consider use of a flow diagram                                                                                                                                                                | Figure 1 |
| Descriptive data             | 14*     | (a) Give characteristics of study participants (eg demographic, clinical, social) and information on exposures and potential confounders                                                          | 8, table |
|                              |         | (b) Indicate number of participants with missing data for each variable of interest                                                                                                               | Figure 1 |
| Outcome data                 | 15*     | Report numbers of outcome events or summary measures                                                                                                                                              | 8        |

1  
2  
3  
4  
5  
6  
7  
8  
9  
10  
11  
12  
13  
14  
15  
16  
17  
18  
19  
20  
21  
22  
23  
24  
25  
26  
27  
28  
29  
30  
31  
32  
33  
34  
35  
36  
37  
38  
39  
40  
41  
42  
43  
44  
45  
46  
47  
48  
49  
50  
51  
52  
53  
54  
55  
56  
57  
58  
59  
60

|                          |    |                                                                                                                                                                                                              |        |
|--------------------------|----|--------------------------------------------------------------------------------------------------------------------------------------------------------------------------------------------------------------|--------|
| Main results             | 16 | (a) Give unadjusted estimates and, if applicable, confounder-adjusted estimates and their precision (eg, 95% confidence interval). Make clear which confounders were adjusted for and why they were included | Tables |
|                          |    | (b) Report category boundaries when continuous variables were categorized                                                                                                                                    | Table  |
|                          |    | (c) If relevant, consider translating estimates of relative risk into absolute risk for a meaningful time period                                                                                             | NA     |
| Other analyses           | 17 | Report other analyses done—eg analyses of subgroups and interactions, and sensitivity analyses                                                                                                               | 9,11   |
| <b>Discussion</b>        |    |                                                                                                                                                                                                              |        |
| Key results              | 18 | Summarise key results with reference to study objectives                                                                                                                                                     | 9,10   |
| Limitations              | 19 | Discuss limitations of the study, taking into account sources of potential bias or imprecision. Discuss both direction and magnitude of any potential bias                                                   | 11     |
| Interpretation           | 20 | Give a cautious overall interpretation of results considering objectives, limitations, multiplicity of analyses, results from similar studies, and other relevant evidence                                   | 10,111 |
| Generalisability         | 21 | Discuss the generalisability (external validity) of the study results                                                                                                                                        | 11     |
| <b>Other information</b> |    |                                                                                                                                                                                                              |        |
| Funding                  | 22 | Give the source of funding and the role of the funders for the present study and, if applicable, for the original study on which the present article is based                                                | 12     |

\*Give information separately for exposed and unexposed groups.

**Note:** An Explanation and Elaboration article discusses each checklist item and gives methodological background and published examples of transparent reporting. The STROBE checklist is best used in conjunction with this article (freely available on the Web sites of PLoS Medicine at <http://www.plosmedicine.org/>, Annals of Internal Medicine at <http://www.annals.org/>, and Epidemiology at <http://www.epidem.com/>). Information on the STROBE Initiative is available at [www.strobe-statement.org](http://www.strobe-statement.org).

# BMJ Open

## Dabigatran initiation in patients with non-valvular AF and first acute ischemic stroke: a retrospective observational study from the SITS registry

|                                 |                                                                                                                                                                                                                                                                                                                                                                                                                                                                                                                                                                                                                                                                                                                                                                                                                                                                                                                                                                                                                                                                                                                                                                                                                                                                                                                                                                                                                                                                                                                                                                                                                                                                                                                                                                                                                                                                                                                                                                                                                   |
|---------------------------------|-------------------------------------------------------------------------------------------------------------------------------------------------------------------------------------------------------------------------------------------------------------------------------------------------------------------------------------------------------------------------------------------------------------------------------------------------------------------------------------------------------------------------------------------------------------------------------------------------------------------------------------------------------------------------------------------------------------------------------------------------------------------------------------------------------------------------------------------------------------------------------------------------------------------------------------------------------------------------------------------------------------------------------------------------------------------------------------------------------------------------------------------------------------------------------------------------------------------------------------------------------------------------------------------------------------------------------------------------------------------------------------------------------------------------------------------------------------------------------------------------------------------------------------------------------------------------------------------------------------------------------------------------------------------------------------------------------------------------------------------------------------------------------------------------------------------------------------------------------------------------------------------------------------------------------------------------------------------------------------------------------------------|
| Journal:                        | <i>BMJ Open</i>                                                                                                                                                                                                                                                                                                                                                                                                                                                                                                                                                                                                                                                                                                                                                                                                                                                                                                                                                                                                                                                                                                                                                                                                                                                                                                                                                                                                                                                                                                                                                                                                                                                                                                                                                                                                                                                                                                                                                                                                   |
| Manuscript ID                   | bmjopen-2020-037234.R1                                                                                                                                                                                                                                                                                                                                                                                                                                                                                                                                                                                                                                                                                                                                                                                                                                                                                                                                                                                                                                                                                                                                                                                                                                                                                                                                                                                                                                                                                                                                                                                                                                                                                                                                                                                                                                                                                                                                                                                            |
| Article Type:                   | Original research                                                                                                                                                                                                                                                                                                                                                                                                                                                                                                                                                                                                                                                                                                                                                                                                                                                                                                                                                                                                                                                                                                                                                                                                                                                                                                                                                                                                                                                                                                                                                                                                                                                                                                                                                                                                                                                                                                                                                                                                 |
| Date Submitted by the Author:   | 23-Mar-2020                                                                                                                                                                                                                                                                                                                                                                                                                                                                                                                                                                                                                                                                                                                                                                                                                                                                                                                                                                                                                                                                                                                                                                                                                                                                                                                                                                                                                                                                                                                                                                                                                                                                                                                                                                                                                                                                                                                                                                                                       |
| Complete List of Authors:       | Escudero-Martinez, Irene; Hospital Universitario Virgen del Rocio, Neurology<br>Mazya, Michael; Department of Neurovascular Diseases, Karolinska University Hospital, Stockholm, Sweden.<br>Teutsch, Christine; Medical Department, TA Cardiometabolism and Metabolics, Boehringer Ingelheim International GmbH, Ingelheim, Germany<br>Lesko, Norbert; Department of Neurology, Faculty of Medicine, Pavol Jozef Šafárik University in Košice, Košice, Slovak Republic<br>Gdovinova, Zuzana; Department of Neurology, Faculty of Medicine, Pavol Jozef Šafárik University in Košice, Košice, Slovak Republic<br>Barbarini, Leonardo; Department of Neurology, Ospedale Vito Fazzi, Lecce, Italy<br>Fryze, Waldemar; Copernicus PI, M. Kopernik Hospital, Gdańsk, Poland<br>Karlinski, Michal ; Second Department of Neurology, Institute of Psychiatry and Neurology, Warsaw, Poland<br>Kobayashi, Adam; Faculty of Health Sciences and Physical Education, Kazimierz Pulaski University of Technology and Humanities<br>Krastev, Georgi ; Department of Neurology, Faculty Hospital Trnava, Trnava, Slovak Republic<br>Paiva Nunes, Ana; Stroke Unit, Centro Hospitalar Lisboa Central, Lisbon, Portugal<br>Pasztoova, Katarina; General Hospital, Komarno, Slovak Republic<br>Peeters, André; Department of Neurology, Cliniques Universitaires St-Luc, Brussels<br>Sobolewski, Piotr; The Faculty of Medicine and Health Sciences, Jan Kochanowski University, Kielce, Poland. Department of Neurology and Stroke Unit, Holy Spirit Specialist Hospital in Sandomierz, Poland<br>Vilionskis, Aleksandras; p. Clinic of Neurology and Neurosurgery, Institute of Clinical Medicine, Vilnius University. Stroke Center, Republican Vilnius University Hospital, Vilnius, Lithuania<br>Toni, Danilo; Department of Human Neurosciences, Sapienza University of Rome, Policlinico Umberto I, Rome, Italy<br>Ahmed, Niazi; Department of Neurovascular Diseases, Karolinska University Hospital, Stockholm, Sweden. |
| <b>Primary Subject Heading</b>: | Neurology                                                                                                                                                                                                                                                                                                                                                                                                                                                                                                                                                                                                                                                                                                                                                                                                                                                                                                                                                                                                                                                                                                                                                                                                                                                                                                                                                                                                                                                                                                                                                                                                                                                                                                                                                                                                                                                                                                                                                                                                         |



1  
2  
3  
4  
5  
6  
7  
8  
9  
10  
11  
12  
13  
14  
15  
16  
17  
18  
19  
20  
21  
22  
23  
24  
25  
26  
27  
28  
29  
30  
31  
32  
33  
34  
35  
36  
37  
38  
39  
40  
41  
42  
43  
44  
45  
46  
47  
48  
49  
50  
51  
52  
53  
54  
55  
56  
57  
58  
59  
60

|                            |                                                                                  |
|----------------------------|----------------------------------------------------------------------------------|
| Secondary Subject Heading: | Cardiovascular medicine                                                          |
| Keywords:                  | Anticoagulation < HAEMATOLOGY, Adult cardiology < CARDIOLOGY, Stroke < NEUROLOGY |
|                            |                                                                                  |

SCHOLARONE™  
Manuscripts

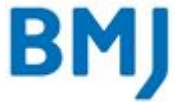

I, the Submitting Author has the right to grant and does grant on behalf of all authors of the Work (as defined in the below author licence), an exclusive licence and/or a non-exclusive licence for contributions from authors who are: i) UK Crown employees; ii) where BMJ has agreed a CC-BY licence shall apply, and/or iii) in accordance with the terms applicable for US Federal Government officers or employees acting as part of their official duties; on a worldwide, perpetual, irrevocable, royalty-free basis to BMJ Publishing Group Ltd ("BMJ") its licensees and where the relevant Journal is co-owned by BMJ to the co-owners of the Journal, to publish the Work in this journal and any other BMJ products and to exploit all rights, as set out in our [licence](#).

The Submitting Author accepts and understands that any supply made under these terms is made by BMJ to the Submitting Author unless you are acting as an employee on behalf of your employer or a postgraduate student of an affiliated institution which is paying any applicable article publishing charge ("APC") for Open Access articles. Where the Submitting Author wishes to make the Work available on an Open Access basis (and intends to pay the relevant APC), the terms of reuse of such Open Access shall be governed by a Creative Commons licence – details of these licences and which [Creative Commons](#) licence will apply to this Work are set out in our licence referred to above.

Other than as permitted in any relevant BMJ Author's Self Archiving Policies, I confirm this Work has not been accepted for publication elsewhere, is not being considered for publication elsewhere and does not duplicate material already published. I confirm all authors consent to publication of this Work and authorise the granting of this licence.

1  
2  
3 **Title: Dabigatran initiation in patients with non-valvular AF and first**  
4 **acute ischemic stroke: a retrospective observational study from the**  
5 **SITS registry**  
6  
7  
8  
9

10 **Authors:** Irene Escudero-Martínez MD<sup>a,b</sup>; Michael V. Mazya MD, PhD<sup>c,d</sup>; Christine  
11 Teutsch MD<sup>e</sup>; Norbert Lesko, MD<sup>f</sup>; Zuzana Gdovinova MD, PhD<sup>f</sup>; Leonardo Barbarini,  
12 MD<sup>g</sup>; Waldemar Fryze MD<sup>h</sup>; Michal Karlinski MD<sup>i</sup>, PhD; Adam Kobayashi MD, PhD<sup>j</sup>;  
13 Georgi Krastev MD<sup>k</sup>; Ana Paiva Nunes MD, PhD<sup>l</sup>; Katarina Pasztoova MD<sup>m</sup>; Andre  
14 Peeters MD, PhD<sup>n</sup>; Piotr Sobolewski MD, PhD<sup>o</sup>; Aleksandras Vilionskis MD, PhD<sup>p</sup>;  
15 Danilo Toni MD, PhD<sup>q</sup>; Niaz Ahmed MD, PhD<sup>c,d</sup>; on behalf of the SITS Investigators.  
16  
17  
18  
19  
20  
21  
22

23 **Affiliation:**

- 24 a. Department of Neurology, University Hospital Virgen del Rocío, Sevilla, Spain.  
25 b. Neurovascular Research Laboratory, Instituto de Biomedicina de Sevilla-IBiS.  
26 c. Department of Neurovascular Diseases, Karolinska University Hospital,  
27 Stockholm, Sweden.  
28 d. Department of Clinical Neuroscience, Karolinska Institutet, Stockholm, Sweden.  
29 e. Medical Department, TA Cardiometabolism and Metabolics, Boehringer  
30 Ingelheim International GmbH, Ingelheim, Germany  
31 f. Department of Neurology, Faculty of Medicine, Pavol Jozef Šafárik University  
32 in Košice, Košice, Slovak Republic  
33 g. Department of Neurology, Ospedale Vito Fazzi, Lecce, Italy  
34 h. Copernicus Pl, M. Kopernik Hospital, Gdańsk, Poland  
35 i. Second Department of Neurology, Institute of Psychiatry and Neurology,  
36 Warsaw, Poland  
37 j. Faculty of Health Sciences and Physical Education, Kazimierz Pulaski  
38 University of Technology and Humanities  
39 k. Department of Neurology, Faculty Hospital Trnava, Trnava, Slovak Republic  
40 l. Stroke Unit, Centro Hospitalar Lisboa Central, Lisbon, Portugal  
41 m. General Hospital, Komarno, Slovak Republic  
42 n. Department of Neurology, Cliniques Universitaires St-Luc, Brussels  
43  
44  
45  
46  
47  
48  
49  
50  
51  
52  
53  
54  
55  
56  
57  
58  
59  
60

- 1  
2  
3 o. The Faculty of Medicine and Health Sciences, Jan Kochanowski University,  
4 Kielce, Poland. Department of Neurology and Stroke Unit, Holy Spirit  
5 Specialist Hospital in Sandomierz, Poland  
6  
7  
8 p. Clinic of Neurology and Neurosurgery, Institute of Clinical Medicine, Vilnius  
9 University. Stroke Center, Republican Vilnius University Hospital, Vilnius,  
10 Lithuania  
11  
12  
13 q. Department of Human Neurosciences, Sapienza University of Rome, Policlinico  
14 Umberto I, Rome, Italy  
15  
16  
17  
18

19 **Corresponding author:**

20 Assoc. Prof. Niaz Ahmed, MD, PhD

21 Department of Neurovascular Diseases, R2:O3

22 Karolinska University Hospital

23 SE-171 76 Stockholm, Sweden

24 Telephone: +46 709720277

25 E-mail: niaz.ahmed@sll.se  
26  
27  
28  
29  
30  
31  
32  
33  
34  
35  
36  
37  
38  
39  
40  
41  
42  
43  
44  
45  
46  
47  
48  
49  
50  
51  
52  
53  
54  
55  
56  
57  
58  
59  
60

## ABSTRACT

**Background and objective:** The optimal timing for initiation of dabigatran after acute ischemic stroke (AIS) is not established. We aimed to evaluate initiation timing and clinical outcomes of dabigatran in AIS patients with non-valvular atrial fibrillation (NVAf).

**Design:** Retrospective study based on prospectively collected data in SITS Thrombolysis and Thrombectomy Registry, (NCT03258645) from July 2014 to July 2018.

**Participants:** European NVAf patients ( $\geq 18$  years) hospitalized after first-ever ischemic stroke.

**Setting:** A multinational, observational monitoring register.

**Intervention:** Dabigatran initiation within 3 months after the ischemic stroke.

**Primary and secondary outcomes:** The primary outcome was time from first-ever ischemic stroke (index event) to dabigatran initiation. Additional outcomes included physicians' reasons for delaying dabigatran initiation beyond acute hospital discharge and outcomes within 3 months of index event.

**Methods:** We identified patients with NVAf who received Dabigatran within 3 months of index event. We performed descriptive statistics for baseline and demographic data and clinical outcomes after dabigatran initiation.

**Results:** In total, 1489 patients with NVAf received dabigatran after AIS treated with thrombolysis and/or thrombectomy. Of these, 1240 had available initiation time. At baseline, median age was 75 years; 53% of patients were female, 15% were receiving an oral anticoagulant, 29% acetylsalicylic acid, and 4% clopidogrel. Most patients (82%) initiated dabigatran within 14 days after the index event. Patients initiating earlier had lower stroke severity: from median NIHSS 8 (IQR 6-13) if initiated within 7 days, to NIHSS 15 (9-19) if initiated between 28 days and 3 months. Most common reasons for delaying initiation were hemorrhagic transformation or intracranial hemorrhage, stroke severity, and infarct size. Few thrombotic/hemorrhagic events occurred within 3 months post-index event (20 of 926 patients, 2.2% with available data).

1  
2  
3  
4  
5 **Conclusions:** Our findings, together with previous observational studies, indicate that  
6 dabigatran initiated within the first days after an AIS is safe in patients treated with  
7 intravenous thrombolysis, endovascular thrombectomy or both.  
8  
9

10  
11  
12 **Strengths and limitations of this study:**

- 13  
14
- 15 • This study shows real-world clinical practice in a wide range of centers and  
16 countries.
  - 17 • To our knowledge, this is the first study of dabigatran for secondary stroke  
18 prevention in patients treated with reperfusion therapies.
  - 19 • The study is observational and based on a retrospective analysis of an ongoing  
20 database, with all the limitations of this type of study design.
  - 21 • Another limitation is that we are only reporting cases deemed by participating  
22 clinicians to be eligible for OAC for secondary prevention  
23  
24  
25  
26  
27  
28

29 **Keywords:** ischemic stroke, atrial fibrillation, secondary prevention, anticoagulation,  
30 intravenous thrombolysis, thrombectomy  
31  
32  
33  
34  
35  
36  
37  
38  
39  
40  
41  
42  
43  
44  
45  
46  
47  
48  
49  
50  
51  
52  
53  
54  
55  
56  
57  
58  
59  
60

## INTRODUCTION

Cardioembolic stroke, the most severe ischemic stroke subtype, related mostly to NVAf, accounts for 13% to 26% of all ischemic strokes.<sup>1</sup> Its recurrence rate within the first 14 days without anticoagulation is around 5%.<sup>2</sup> Anticoagulation using heparin decreases the risk of ischemic stroke recurrence to 3.0%, but at the cost of 1.8% increase risk of the absolute risk of intracranial bleeding.<sup>3</sup> Meanwhile, the rate of ischemic stroke recurrence may decrease to as low as 2.8% within 90 days when a direct oral anticoagulant (DOAC) is prescribed.<sup>4</sup> For clinicians, the decision on when to initiate anticoagulation after an acute ischemic stroke (AIS) is still a challenge, mainly due to perceived risk of early intracerebral hemorrhage.

The latest Cochrane systematic review in 2015 concluded that early anticoagulant therapy is not associated with net short- or long-term benefit in patients with AIS.<sup>5</sup> Moreover, neither national nor international stroke guidelines give firm recommendations. The AHA-ASA 2018 guidelines state that starting oral anticoagulation (OAC) within 4-14 days after AIS is reasonable for most patients, and the European Society of Cardiology (ESC) 2016 and European Heart Rhythm Association (EHRA) 2018 guidelines, endorsed by the European Stroke Organisation (ESO), recommend starting OAC 1, 3, 6 and 12 days, respectively, after transient ischemic attack, minor, moderate and severe strokes.<sup>6, 7, 8</sup>

Clinical practice is therefore to delay anticoagulation by up to 14 days. As the risk of recurrence during this time is around 5%, many clinicians anticoagulate earlier, guided by the approximate size of the infarct and absence or presence of any hemorrhagic transformation.

The lower overall risk of intracranial hemorrhage with DOACs compared to vitamin K antagonists (VKA) may facilitate earlier anticoagulation using DOACs in these patients.<sup>9</sup> Recent observational studies indicate that the risk of symptomatic intracranial hemorrhage (SICH) in patients treated with DOACs within the first 5 days of ischemic stroke is low.<sup>10,11,12</sup> A pooled individual patient data analysis of 7 observational studies concluded that DOACs started early after AIS were associated with reduced risk of poor clinical outcomes compared with VKA, mainly due to lower risk of ICH.<sup>13</sup>

1  
2  
3 Regarding dabigatran, patients were randomized in the RE-LY trial no sooner than 14  
4 days after AIS.<sup>14</sup> More recently, a smaller trial including 301 patients with TIA or minor  
5 ischemic stroke (NIHSS < 9) showed that dabigatran and aspirin had similar safety,  
6 with a non-significant trend for fewer early recurrent ischemic strokes in the dabigatran  
7 arm.<sup>15,16</sup>  
8  
9

10  
11 **The optimal timing of anticoagulation after an AIS is not established, and until**  
12 **results of ongoing randomized controlled trials are published, observational**  
13 **studies are needed to provide recommendations for clinical practice.**  
14  
15  
16

17  
18 The primary aim of this observational study was to evaluate the timing of dabigatran  
19 initiation in acute ischemic stroke patients with NVAf treated with IV thrombolysis,  
20 mechanical thrombectomy, or both. Secondary aims were: (1) to report physicians'  
21 reasons to delay OAC and (2) to evaluate clinical outcomes at 3-month follow-up.  
22  
23  
24  
25

## 26 27 **MATERIAL AND METHODS**

28  
29

30 Patients presenting with first ever acute ischemic stroke and NVAf recorded in the  
31 SITS-AF registry between July 2014 and July 2018 were included.  
32  
33

34 The SITS-AF registry is a subset of the SITS-ISTR, an ongoing, prospective, academic-  
35 driven, multinational, register for clinical centers treating patients with acute stroke. The  
36 methodology of the SITS-ISTR, including procedures for data collection and  
37 management, patient identification and verification of source data, has been described  
38 previously.<sup>17</sup>  
39  
40  
41  
42  
43

44 In the present study, patients were included if they presented with stroke symptoms and  
45 were treated with intravenous alteplase (Actilyse, Boehringer Ingelheim, Germany)  
46 within or outside license criteria, and/or with endovascular thrombectomy. Data  
47 collection in this study was done under the umbrella of SITS-MOST II study which was  
48 approved by the Stockholm Ethics committee. Need for ethical approval or patient  
49 consent for participation in the SITS-ISTR varied among participating countries. Ethics  
50 approval and patient consent were obtained in countries that required this; other  
51 countries approved the register for conduct as an anonymized audit.  
52  
53  
54  
55  
56  
57  
58  
59  
60



1  
2  
3 We collected baseline and demographic characteristics, premorbid modified Rankin  
4 Scale (mRS), variables required for CHA<sub>2</sub>DS<sub>2</sub>-VASc and HAS-BLED scores, stroke  
5 severity per the NIHSS, medication history, imaging data at admission and follow up,  
6 time interval in days between index event and start of dabigatran and physicians'  
7 reasons for delaying dabigatran initiation beyond acute hospital discharge. Follow-up  
8 period for this study was 3 months, during which we collected information on any new  
9 clinical events, functional outcome using the mRS, and death. All assessments of  
10 imaging studies, neurological, and functional status were done according to clinical  
11 routine at centers participating in the SITS-ISTR.  
12  
13  
14  
15  
16  
17  
18  
19

### 20 **Outcomes**

21 The primary outcome was the time from index event (first-ever ischemic stroke) to  
22 dabigatran initiation. Secondary outcomes included: physicians' reasons for delaying  
23 dabigatran initiation beyond acute hospital discharge and clinical outcomes of interest  
24 within 3 months of index event. Clinical outcomes of interest include death, stroke or  
25 systemic embolism, ICH or major bleeding defined according to the International  
26 Society on Thrombosis and Hemostasis, all within 3 months after the index event.<sup>18</sup> The  
27 timing of initiation was at the discretion of the treating physicians.  
28  
29  
30  
31  
32  
33  
34

### 35 **Statistical analysis**

36 We performed descriptive statistics for baseline, imaging, and demographic data. For  
37 continuous variables, median and interquartile range values were obtained. For  
38 categorical variables, we calculated percentage proportions by dividing the number of  
39 events by the total number of patients, excluding missing or unknown cases.<sup>16</sup>  
40 Comparisons were made using Mann–Whitney U test and  $\chi^2$  test, as appropriate.  
41 Pearson correlation coefficient was used to correlate dabigatran initiation time with  
42 continuous variables. A multivariable regression model including potential confounders  
43 (clinically relevant variables and variables based on a univariate significance of  $p <$   
44  $0.05$ ) was used to establish association between baseline variables and dabigatran  
45 initiation time. Because of the low number of events, no inferential analysis was  
46 performed. To calculate annualized incidence rates we calculated the number of patient-  
47 years (number of included patients multiplied by the follow-up time in years). Incidence  
48  
49  
50  
51  
52  
53  
54  
55  
56  
57  
58  
59  
60

1  
2  
3 rates were expressed per 100 person-years. The 95% CIs for incidence rates were  
4 calculated using Fisher's exact test.  
5  
6

### 7 **Patient and Public Involvement**

8 Patients or the public were not involved in the design, conduct, reporting, or  
9 dissemination plans of our research  
10  
11  
12

## 13 **RESULTS**

14  
15  
16  
17  
18 The dataset comprised 14695 patients with first-ever AIS and NVAF, diagnosed either  
19 before the stroke or within 3 months after the event. Of these, 1489 patients received  
20 dabigatran treatment for secondary prevention. Information regarding dabigatran  
21 initiation timing was available in 1240 patients, who were the study population for  
22 primary outcome (figure 1). Baseline and demographic characteristics in aggregate are  
23 presented in table 1. Baseline characteristics according to time of dabigatran initiation  
24 are presented in Supplementary Tables 1. Median age was 75 (69-82) years, 656 (53%)  
25 patients were female. Median NIHSS at admission was 10 (6-16). The median time  
26 from index stroke to dabigatran initiation was 8 (4-12) days. About 82% of patients  
27 initiated dabigatran within 14 days after the index stroke (supplementary figure 1).  
28 Univariate analysis showed that higher NIHSS score at baseline and higher pre-stroke  
29 mRS were associated with a delay of dabigatran initiation ( $p < 0.001$  and  $0.01$   
30 respectively). Multivariate regression analysis including clinically significant variables  
31 (age, gender, baseline NIHSS, systolic blood pressure on admission, glucose level at  
32 admission) showed that older age ( $p=0.02$ ), higher diastolic blood pressure on  
33 admission ( $p=0.002$ ), higher previous CHA<sub>2</sub>DS<sub>2</sub>-VASc score ( $p=0.04$ ) and a history of,  
34 or predisposition to bleeding ( $p=0.03$ ) were independently associated with a delay of  
35 dabigatran initiation.  
36  
37  
38  
39  
40  
41  
42  
43  
44  
45  
46  
47  
48  
49  
50

### 51 **Reasons for delaying anticoagulation**

52 Regarding reasons for delaying dabigatran initiation beyond the period of acute  
53 hospitalization, a total of 268 reasons were reported in 203 patients (one reason in 160  
54 patients, more than one in 43). Table 2 shows the distribution of physician responses.  
55 Of all reasons given, 65.3% were related to the index event, the most frequent being  
56  
57  
58  
59  
60

1  
2  
3 stroke severity (22.8%), size of infarct (19.4%) and hemorrhagic transformation  
4 (14.9%).  
5  
6  
7

### 8 **Follow-up**

9  
10 In total, 926 patients had available information at 3-month follow-up regarding clinical  
11 events since discharge, resulting in a cumulative follow-up time of 231.5 patient-years.  
12 Of these 926, information about the primary outcome (timing of dabigatran initiation)  
13 was only available for 702 patients.  
14  
15

16  
17 Among 926 patients, 101 experienced at least one event, with a total of 107 events  
18 reported. Of these, 20 (2.2%) were considered events of interest (embolism or  
19 hemorrhage, defined as new stroke, myocardial infarct, pulmonary embolism or  
20 systemic embolism, as well as intracranial hemorrhage, and major extracranial  
21 hemorrhage). 13 of these events were embolic/ischemic (7 new stroke since discharge  
22 [3.02%/y, 95% CI 1.22-6.23], 3 myocardial infarction, 2 pulmonary embolism and 1  
23 systemic embolism) and 7 were hemorrhagic (1 intracranial hemorrhage [0.43%/y, 95%  
24 CI 0.01-2.13] and 6 major extracranial hemorrhage). There were no differences in the  
25 distribution of events of interest and initiation time.  
26  
27  
28  
29  
30  
31

32 Data on mRS at 3 months after the index event were available in 1018 patients. A total  
33 of 697 patients (68.5%) were functionally independent (mRS 0-2), and 31 (3%) had  
34 died. Causes of death were recorded as follows: 10 (32%) due to index cerebral  
35 infarction, 1 (3.2%) patient due to ICH, 2 (6.5%) patients due to pneumonia, 2 (6.5%)  
36 patients due to pulmonary embolism, 6 (19.4%) patients due to other causes and 10  
37 (32%) patients had an unknown cause.  
38  
39  
40  
41  
42  
43

44 Tables 3 and 4 show comparisons of our results with previously reported observational  
45 studies. Patients in our study were older and had a higher stroke severity. Our findings  
46 regarding events of interest are in line with those previously reported.  
47  
48  
49  
50

### 51 **DISCUSSION**

52  
53  
54 This large observational study shows that dabigatran in clinical practice is most  
55 commonly initiated early (82% patients within first 14 days) after an AIS. The rate of  
56 ischemic or hemorrhagic complications during the first three months after early  
57 initiation of dabigatran is low. Our findings suggest that the safety profile of dabigatran  
58  
59  
60

1  
2  
3 for secondary stroke prevention in clinical practice is similar to findings in the RE-LY  
4 trial.<sup>14</sup>  
5  
6  
7

8 We have compared our results with those in recently published observational studies  
9 (tables 3 & 4). At a median age of 76, the patients in our series were older than in other  
10 studies, with the exception of the NOACISP.<sup>10,11,12,19</sup> Importantly, our patients had a  
11 much higher stroke severity than those in previous publications, due to the fact that they  
12 received intravenous and/or endovascular reperfusion therapies, median NIHSS 10 in  
13 our patients vs. 2 – 7 in previous observational studies.<sup>10,11,12,19</sup> The higher NIHSS score  
14 and older age likely had a major influence on our finding that dabigatran was initiated at  
15 median 8 days, compared to 2-4 days in previous studies.<sup>10,11,19</sup> Both stroke severity  
16 and reperfusion treatment, are associated with an elevated hemorrhagic risk. In spite of  
17 this, the rate of large parenchymal hematoma (PH2-PHr2) in our study was 1%  
18 compared to 2.7% to 5.1% previously reported in IVT patients and the rate of ICH  
19 within 3 months from index event was even lower, at 0.1%, compared to 5.1% at 90  
20 days in a meta-analysis of endovascular thrombectomy (EVT).<sup>20,21,22</sup> However, these  
21 findings should be interpreted with caution due to potential selection bias, as patients  
22 with early severe symptomatic bleeding after acute treatment may have died, or if alive,  
23 may have been too severely disabled to be considered for OAC initiation – potentially  
24 removing bleeding-prone patients from the treatment-eligible population.  
25  
26  
27  
28  
29  
30  
31  
32  
33  
34  
35  
36  
37  
38

39 According to the RAF-NOAC study, the period of DOAC initiation with the lowest  
40 rates of ischemic recurrence and major bleeding events would be 3 to 14 days after the  
41 index event (2.1% for composite AIS, TIA, symptomatic systematic embolism and  
42 major bleeding).<sup>12</sup> Although our numbers of events were too low for significance testing  
43 between periods, the period with the lowest rate of safety events was 3-7 days after AIS  
44 (1.7% for composite AIS, TIA, symptomatic systematic embolism and major bleeding).  
45 When comparing safety events in our study and the dabigatran subgroup of RAF-  
46 NOAC, the rate of the composite outcome is similar (2.2% vs 2.4%), but in our series  
47 the rates of stroke or TIA and ICH were lower.  
48  
49  
50  
51  
52  
53  
54  
55

56 Our study adds new data to the recent observational studies regarding anticoagulation  
57 after AIS. This literature together with guideline recommendations and patients'  
58  
59  
60

1  
2  
3 individual embolic and hemorrhagic risks should guide the decision on when to start  
4 OAC therapy.  
5  
6  
7

8 We have described physicians' reasons to delay anticoagulation. Previous registry  
9 studies have shown an underutilization of OAC both in primary prevention and after  
10 AIS.<sup>23,24,25</sup> Several reasons could explain this: lack of knowledge of current guidelines,  
11 physician concern for the risk of bleeding, and clinical factors, such as poor functional  
12 outcome after stroke, advanced age or the risk of falling. In our study, reasons for the  
13 delay of dabigatran initiation were mostly related to the index event and its putative  
14 high hemorrhagic risk.<sup>26</sup>  
15  
16  
17  
18  
19  
20  
21

22 Our study has some limitations. The main one, is that it only includes patients treated  
23 with IVT and/or endovascular thrombectomy. Thus, there is a matter of selection of  
24 cases eligible for such therapies (whether treated on- or off-label and within or outside  
25 guidelines). These cases are likely to have more severe strokes, may have a lower pre-  
26 morbid score on mRS and other differences, compared to an unselected NVAf stroke  
27 population. Another limitation is that 16% of patients initiating dabigatran within 3  
28 months from index event had no available information on exact initiation timing. A  
29 sensitivity analysis (supplementary table II) comparing clinical characteristics between  
30 patients with and without known initiation time showed that the latter group had higher  
31 NIHSS scores and glucose levels at baseline, less frequent history of previous AF and  
32 more frequently had endovascular treatment. These differences could potentially have  
33 biased our results to some extent in favor of earlier dabigatran initiation. Moreover, we  
34 are only reporting cases deemed by participating clinicians to be eligible for OAC  
35 treatment. In 4 cases of events of interest, information about dabigatran initiation timing  
36 was not available, but sensitivity analysis has been performed under different  
37 distribution assumptions and showed no statistical significance regarding time initiation  
38 groups.  
39  
40  
41  
42  
43  
44  
45  
46  
47  
48  
49  
50  
51

52 The strengths of our study are that it shows real-world clinical practice in a wide range  
53 of centers and countries, in which the timing of OAC was not standardized across the  
54 study but left to the discretion of the individual physicians and centers. It is also, to our  
55 knowledge, the first study of dabigatran for secondary stroke prevention in patients  
56 treated with IVT and or EVT, a population in which there may be even more  
57  
58  
59  
60

1  
2  
3 controversy about when to start OAC due to a potentially elevated risk of hemorrhage.  
4 In addition, our data add important safety information on dabigatran, as the population  
5 in this study was not included in the pivotal dabigatran trial RE-LY (patients with a  
6 recent acute stroke were excluded).  
7  
8  
9

10  
11 Four large randomized controlled trials, OPTIMAS (EudraCT, 2018-003859-38; UK),  
12 TIMING (NCT02961348; Sweden), START (NCT03021928; USA) and ELAN  
13 (NCT03148457; Switzerland), are investigating the benefit of early DOAC  
14 administration in patients with AF-related ischemic stroke. The results of these trials are  
15 expected in the coming years; in the meantime, clinicians have to rely on data from  
16 observational studies.  
17  
18  
19  
20  
21  
22

### 23 **Conclusions**

24 Our findings, together with previous observational studies, suggest that dabigatran  
25 initiated within the first days after AIS is safe in patients treated with intravenous  
26 thrombolysis, endovascular thrombectomy, or both.  
27  
28  
29  
30  
31

### 32 **ACKNOWLEDGEMENT**

33 The authors would like to thank the SITS Registry Investigators and patients.  
34  
35  
36  
37

### 38 **SOURCES OF FUNDING**

39 This study is sponsored by Boehringer-Ingelheim. In addition, the SITS registry is  
40 financed directly and indirectly by grants from Karolinska Institutet, Stockholm County  
41 Council, the Swedish Heart-Lung Foundation, the Swedish Order of St. John, Friends of  
42 Karolinska Institutet, and private donors, as well as from an unrestricted sponsorship  
43 from Boehringer-Ingelheim. SITS has previously received grants from the European  
44 Union Framework 7, the European Union Public Health Authority and Ferrer  
45 International, EVER Pharma. SITS is currently conducting studies supported by  
46 Boehringer-Ingelheim as well as in collaboration with Karolinska Institutet, supported  
47 by Stryker, Covidien and Phenox.  
48  
49  
50  
51  
52  
53

54 Irene Escudero-Martínez has received a grant from “Fundación Progreso y Salud, Junta  
55 de Andalucía” (grant EF-0437-2018).  
56  
57  
58  
59  
60

## ETHICAL APPROVAL

Data collection in this study was done within the framework of SITS-MOST II study which was approved by the Stockholm Ethics committee.

**DATA SHARING STATEMENT:** All data relevant to the study are included in the article or uploaded as supplementary.

## CONFLICT OF INTEREST / DISCLOSURES

Niaz Ahmed is chair of SITS International, which receives a grant from Boehringer Ingelheim for the SITS-ISTR.

Michael Mazya is International Network and Research Executive at SITS International, which receives a grant from Boehringer Ingelheim for the SITS-ISTR.

## CONTRIBUTORSHIP

MM and NA were involved in protocol development. MM and IEM were involved in data analysis. IEM and NA wrote the first draft of the manuscript. CT, NL, ZG, LB, WF, MK, AK, GK, APN, KP, AP, PS, AV and DT reviewed and edited the manuscript and approved the final version of the manuscript.

## REFERENCES

<sup>1</sup> Seiffge D, Werring DJ, Paciaroni M, Dawson J, Warach S, Milling TJ et al. Timing of anticoagulation after recent ischaemic stroke in patients with atrial fibrillation. *Lancet Neurol* 2019;18:117-126.

<sup>2</sup> Saxena R, Lewis S, Berge E, Sandercock PAG, Koudstaal PJ for the IST Collaborative Group. Risk of early death and recurrent stroke and effect of heparin in 3169 patients with acute ischemic stroke and atrial fibrillation in the International Stroke Trial. *Stroke* 2001;32:2333-2337.

<sup>3</sup> Paciaroni M, Agnelli G, Micheli S, Caso V. Efficacy and safety of anticoagulant treatment in acute cardioembolic stroke: a meta-analysis of randomized controlled trials. *Stroke*. 2007;38:423-430.

<sup>4</sup> Paciaroni M, Agnelli G, Falocci N, et al. Early recurrence and major bleeding in patients with acute ischemic stroke and atrial fibrillation treated with non-vitamin-K oral anticoagulants (RAF-NOACs) study. *J Am Heart Assoc* 2017; 6: e007034.

- 1  
2  
3  
4  
5  
6  
7  
8  
9  
10  
11  
12  
13  
14  
15  
16  
17  
18  
19  
20  
21  
22  
23  
24  
25  
26  
27  
28  
29  
30  
31  
32  
33  
34  
35  
36  
37  
38  
39  
40  
41  
42  
43  
44  
45  
46  
47  
48  
49  
50  
51  
52  
53  
54  
55  
56  
57  
58  
59  
60
- 
- <sup>5</sup> Sandercock PA, Counsell C, Kane EJ. Anticoagulants for acute ischaemic stroke. *Cochrane Database Syst Rev*. 2015;3:CD000024. DOI:10.1002/14651858.CD000024.pub4.
- <sup>6</sup> Powers WJ, Rabinstein AA, Ackerson T, et al. 2018 Guidelines for the early management of patients with acute ischemic stroke: a guideline for healthcare professionals from the American Heart Association/American Stroke Association. *Stroke* 2018;49(3):e46-e110.
- <sup>7</sup> Kirchhof P, Benussi S, Kotecha D, Ahlsson A, Atar D, Casadei B et al. 2016 ESC Guidelines for the management of atrial fibrillation developed in collaboration with EACTS: the Task Force for the management of atrial fibrillation of the European Society of Cardiology (ESC). Developed with the special contribution of the European Heart Rhythm Association (EHRA) of the ESC: endorsed by the European Stroke Organisation (ESO). *Eur Heart J* 2016;37:2893–2962.
- <sup>8</sup> Steffel J, Verhamme P, Potpara TS, Albaladejo P, Antz M, Desteghe L et al. The 2018 European Heart Rhythm Association Practical Guide on the use of non-vitamin K antagonist oral anticoagulants in patients with atrial fibrillation: executive summary. *Eur Heart Journal* 2018;39:1330-1393.
- <sup>9</sup> Ntaios G, Papavasileiou V, Diener HC, Makaritsis K, Michel P. Nonvitamin-K-Antagonist oral anticoagulants in patients with atrial fibrillation and previous stroke or transient ischemic attack. A systematic review and meta-analysis of randomized controlled trials. *Stroke*. 2012;43:3298-3304.
- <sup>10</sup> Seiffge DJ, Traenka C, Polymeris A, Hert L, Peters N, Lyrer P et al. Early start of DOAC after ischemic stroke: risk of intracranial hemorrhage and recurrent events. *Neurology* 2016;87:1856-1862.
- <sup>11</sup> Arihiro S, Todo K, Koga M, Furui E, Kinoshita N, Kimura K et al. Three-month risk-benefit profile of anticoagulation after stroke with atrial fibrillation: the SAMURAI-Nonvalvular Atrial Fibrillation (NVAf) study. *Int J Stroke* 2016;11:565-574.
- <sup>12</sup> Paciaroni M, Agnelli G, Falocci N, Tsivgoulis G, Vadikolias K, Liantinioti C et al. Early recurrence and major bleeding in patients with acute ischemic stroke and atrial fibrillation treated with non-vitamin-K oral anticoagulants (RAF-NOACs) study. *J Am Heart Assoc* 2017;6e007034.
- <sup>13</sup> Seiffge DJ, Paciaroni M, Wilson D, Koga M, Macha K, Cappellari M et al. DOAC vs VKA after recent ischemic stroke in patients with atrial fibrillation. *Ann Neurol* 2019;13. Doi:10.1002/ana.25498
- <sup>14</sup> Diener HC, Connolly SJ, Ezekowitz MD, Wallentin L, Reilly PA, Yang S et al. Dabigatran compared with warfarin in patients with atrial fibrillation and previous transient ischaemic attack or stroke: a subgroup analysis of the RE-LY trial. *Lancet Neurol* 2010;9:1157–1163.



1  
2  
3  
4 15 Ng KH, Sharma M, Benavente O, et al. Dabigatran following acute transient ischemic  
5 attack and minor stroke II (DATAS II). *Int J Stroke* 2017; 12: 910–914.  
6

7  
8 16 Butcher K, Ng K, Field T. The dabigatran following acute transient ischemic attack  
9 and minor stroke trial: final results. *Eur Stroke J* 2018; 3 (suppl 1): 3 (abstr).  
10

11 17 Wahlgren N, Ahmed N, Dávalos A, Ford GA, Grond M, Hacke W, et al; SITS-  
12 MOST investigators. Thrombolysis with alteplase for acute ischaemic stroke in the Safe  
13 Implementation of Thrombolysis in Stroke- Monitoring Study (SITS-MOST): an  
14 observational study. *Lancet*. 2007;369:275–282.  
15

16  
17 18 Schulman S, Kearon C, on behalf on the subcommittee on control of anticoagulation  
18 of the scientific and standardization committee of the international society on thrombosis  
19 and haemostasis. Definition of major bleeding in clinical investigations of  
20 antihemostatic medicinal products in non-surgical patients. *Journal of Thrombosis and*  
21 *Haemostasis*. 2005;3:692-694.  
22

23  
24 19 Gioia LC, Kate M, Sivakumar L et al. Early Rivaroxaban use after cardioemboli  
25 stroke may not result in hemorrhagic transformation: a prospective MRI study. *Stroke*  
26 2016;47:1917-1919.  
27

28  
29 20 Emberson J, Lees KR, Lyden P, Blackwell L, Albers G, Bluhmki E et al. for the  
30 Stroke Thrombolysis Trialists' Collaborative Group. Effect of treatment delay, age, and  
31 stroke severity on the effects of intravenous thrombolysis with alteplase for acute  
32 ischaemic stroke: a meta-analysis of individual patient data from randomised trials.  
33 *Lancet* 2014;384:1929-1935.  
34

35  
36 21 Mazya M, Lees KR, Collas D, Rand VM, Mikulik R, Toni D et al. IV thrombolysis in  
37 very severe and severe ischemic stroke: Results from the SITS-ISTR Registry.  
38 *Neurology* 2015;85:2098-2106.  
39

40  
41 22 Goyal M, Menon BK, van Zwam WH, Dippel DWJ, Mitchell PJ, Demchuk AM et al.  
42 Endovascular thrombectomy after large-vessel ischaemic stroke: a meta-analysis of  
43 individual patient data from five randomised trials. *Lancet* 2016;387:1723–1731.  
44

45  
46 23 Mazurek M, Shantsila E, Lane DA, et al. Guideline-Adherent Antithrombotic  
47 Treatment Improves Outcomes in Patients With Atrial Fibrillation: Insights From the  
48 Community-Based Darlington Atrial Fibrillation Registry. *Mayo Clin Proc*  
49 2017;92:1203–1213.  
50

51  
52 24 Gundlund A, Xian Y, Peterson ED, Butt JH, Gadsbøll K, Olesen JB et al. Prestroke  
53 and poststroke antithrombotic therapy in patients with atrial fibrillation: results from a  
54 nationwide cohort. *JAMA Netw Open* 2018;1:1-12.  
55

56  
57 25 Groot AE, Vermeji J-D M, Westendorp WF, Nederkoorn PJ, van de Beck D,  
58 Coutinho J. Continuation or Discontinuation of Anticoagulation in the Early Phase  
59 After Acute Ischemic Stroke. *Stroke* 2018;49:1762-1765.  
60

26 Álvarez-Sabin J, Maisterra O, Santamaría E, Kase CS. Factors influencing haemorrhagic transformation in ischaemic stroke. *Lancet Neurol* 2013; 12: 689–705.

### Figure legend

Figure 1. Flowchart of the study.

### Tables

|                                                   | Dabigatran patients with available time of initiation<br>N = 1240 |
|---------------------------------------------------|-------------------------------------------------------------------|
| Age (Mean, SD)<br>(Median, IQR)                   | 75 ± 10<br>(69-82)                                                |
| Gender<br>(N, %, Female)                          | 656 (52.9%)                                                       |
| NIHSS baseline<br>(Median, IQR)                   | 10 (6-16)                                                         |
| SBP<br>(mm Hg, Mean, SD)                          | 153 ± 23                                                          |
| DBP<br>(mm Hg, Mean, SD)                          | 85 ± 15                                                           |
| Glucose<br>(mmol/dl, Mean, SD)                    | 7.3 ± 2.3                                                         |
| Weight<br>(kg, Mean, SD)                          | 78 ± 15                                                           |
| Hypertension<br>(N, %)                            | 955 (77%)                                                         |
| Diabetes<br>(N, %)                                | 216 (17.4%)                                                       |
| Hyperlipidemia<br>(N, %)                          | 349 (28.1%)                                                       |
| Previous TIA<br>(N, %)                            | 65 (5.3%)                                                         |
| Current smoker<br>(N, %)                          | 88 (7.1%)                                                         |
| Previous smoker<br>(N, %)                         | 107 (8.8%)                                                        |
| Congestive heart failure<br>(N, %)                | 134 (10.9%)                                                       |
| Vascular disease<br>(N, %)                        | 149 (12%)                                                         |
| Renal impairment<br>(N, %)                        | 30 (2.6%)                                                         |
| Abnormal liver function<br>(N, %)                 | 16 (1.4%)                                                         |
| Alcohol use<br>(N, %)                             | 37 (3.2%)                                                         |
| History of / predisposition to bleeding<br>(N, %) | 30 (2.6%)                                                         |
| Labile INR<br>(N, %)                              | 39 (3.5%)                                                         |
| Previous AF<br>(N, %)                             | 720 (58.6%)                                                       |
| Previous mRS<br>(Median, IQR)                     | 0<br>(0-0)                                                        |
| Previous CHA2DS2-VASc (Mean)<br>(Median, IQR)     | 3.1<br>3 (2-4)                                                    |
| Previous HAS-BLED (Mean)<br>(Median, IQR)         | 1.7<br>1 (1-2)                                                    |
| CHA2DS2-VASc Discharge (Mean)<br>(Median, IQR)    | 5.1<br>5 (4-6)                                                    |
| HAS-BLED Discharge (Mean)<br>(Median, IQR)        | 2.7<br>3 (2-3)                                                    |

|                   |              |
|-------------------|--------------|
| IVT<br>(N, %)     | 1055 (85.1%) |
| EVT<br>(N, %)     | 68 (5.5%)    |
| IVT+EVT<br>(N, %) | 117 (9.4%)   |

**Table 1. Baseline characteristics of dabigatran patients included in the study.**

| Reasons for delay                          | N          | Percent     |
|--------------------------------------------|------------|-------------|
| Severity of stroke                         | 61         | 22.8%       |
| Size of infarct                            | 52         | 19.4%       |
| Hemorrhagic transformation                 | 40         | 14.9%       |
| ICH                                        | 8          | 3.0%        |
| Reason not specified                       | 27         | 10.1%       |
| Patient bleeding risk factors              | 18         | 6.7%        |
| Location of infarct                        | 14         | 5.2%        |
| Practical considerations                   | 14         | 5.2%        |
| Intervention used to treat ischemic stroke | 8          | 3.0%        |
| Patient stroke risk factors                | 6          | 2.2%        |
| Recommendation from specialist             | 6          | 2.2%        |
| Altered coagulation parameters             | 5          | 1.9%        |
| Other reasons                              | 5          | 1.9%        |
| Patient preference                         | 4          | 1.5%        |
| <b>Total</b>                               | <b>268</b> | <b>100%</b> |

**Table 2. Distribution of physician reasons to delay dabigatran initiation until after discharge from acute stroke care.**

|                                                | <b>Dabigatran SITS</b><br><b>N=1240</b> | NOACISP (all patients)<br><b>N=204</b> | Gioia et al <sup>19</sup><br><b>N=60</b> | SAMURAI (NOACs)<br><b>N=475</b> | RAF-NOAC (Dabigatran group)<br><b>N=381</b> |
|------------------------------------------------|-----------------------------------------|----------------------------------------|------------------------------------------|---------------------------------|---------------------------------------------|
| Median/<br>Mean* age                           | <b>76 (69-82)</b>                       | 79 (73-84)                             | 73.5 +/-<br>13.2*                        | 74.4 +/- 9.2*                   | 73.6 +/- 9.9*                               |
| Median/<br>Mean*<br>NIHSS<br>(at<br>admission) | <b>10 (6-16)</b>                        | 4 (2-8)                                | 2 (0-4) at<br>Rivaroxaban<br>initiation  | 4 (1-13)                        | 7.7 +/- 6.2*                                |
| Median<br>delay (days)                         | <b>8 (4-12)</b>                         | 5 (3-11)<br>(Dabigatran<br>group)      | 3 (1.5-6)                                | 4 (2-7)                         | 8 (3-14)                                    |

**Table 3. Comparison of our results with previous observational studies of NOACs with 90 days of follow-up.**

|                                             | <b>Dabigatran (N=926)</b> | RAF-NOAC (Dabigatran N=381) |
|---------------------------------------------|---------------------------|-----------------------------|
| All safety events                           | <b>20 (2.2%)</b>          | 9 (2.4%)                    |
| <b>Embolism</b>                             | <b>13 (1.4%)</b>          | <b>7 (1.8%)</b>             |
| Stroke/TIA                                  | <b>7 (0.8%)</b>           | 7 (1.8%)                    |
| Other thromboembolic events (MI, PE, or SE) | <b>6 (0.7%)</b>           | 0                           |
| <b>Major hemorrhage</b>                     | <b>7 (0.8%)</b>           | <b>2 (0.5%)</b>             |
| ICH                                         | <b>1 (0.1%)</b>           | 2 (0.5%)                    |

---

**Table 4. Comparison of our results with dabigatran treated patients from a previous observational study with 90 days of follow-up.**

For peer review only

1  
2  
3  
4  
5  
6  
7  
8  
9  
10  
11  
12  
13  
14  
15  
16  
17  
18  
19  
20  
21  
22  
23  
24  
25  
26  
27  
28  
29  
30  
31  
32  
33  
34  
35  
36  
37  
38  
39  
40  
41  
42  
43  
44  
45  
46  
47  
48  
49  
50  
51  
52  
53  
54  
55  
56  
57  
58  
59  
60

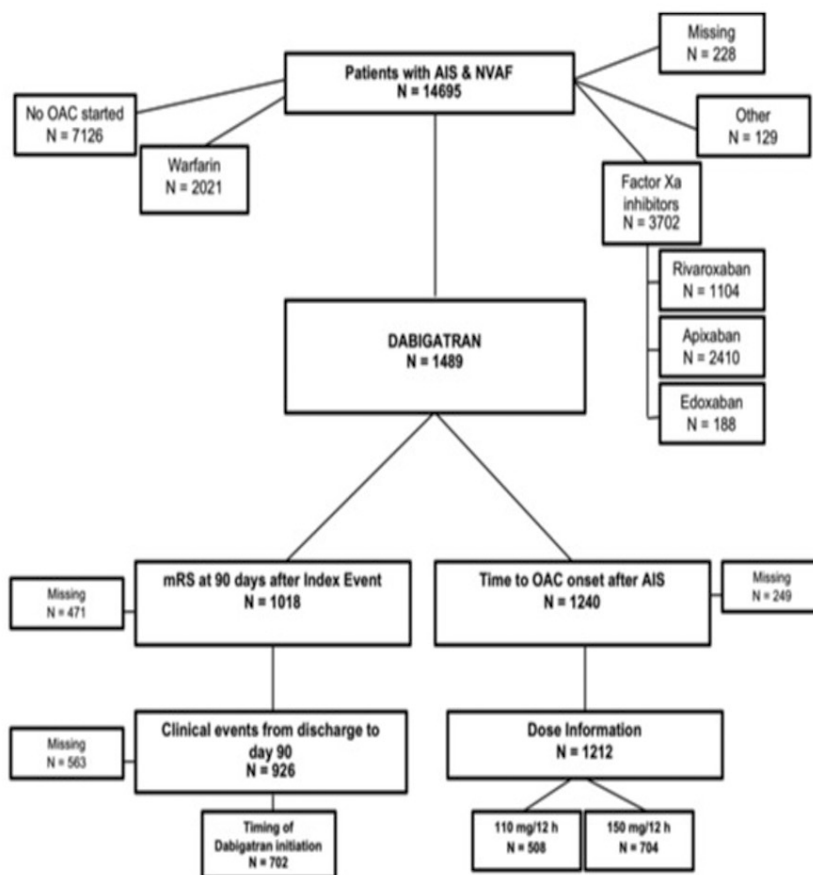

Figure 1. Flowchart of the study.

90x90mm (300 x 300 DPI)

1  
2  
3  
4  
5  
6  
7  
8  
9  
10  
11  
12  
13  
14  
15  
16  
17  
18  
19  
20  
21  
22  
23  
24  
25  
26  
27  
28  
29  
30  
31  
32  
33  
34  
35  
36  
37  
38  
39  
40  
41  
42  
43  
44  
45  
46  
47  
48  
49  
50  
51  
52  
53  
54  
55  
56  
57  
58  
59  
60

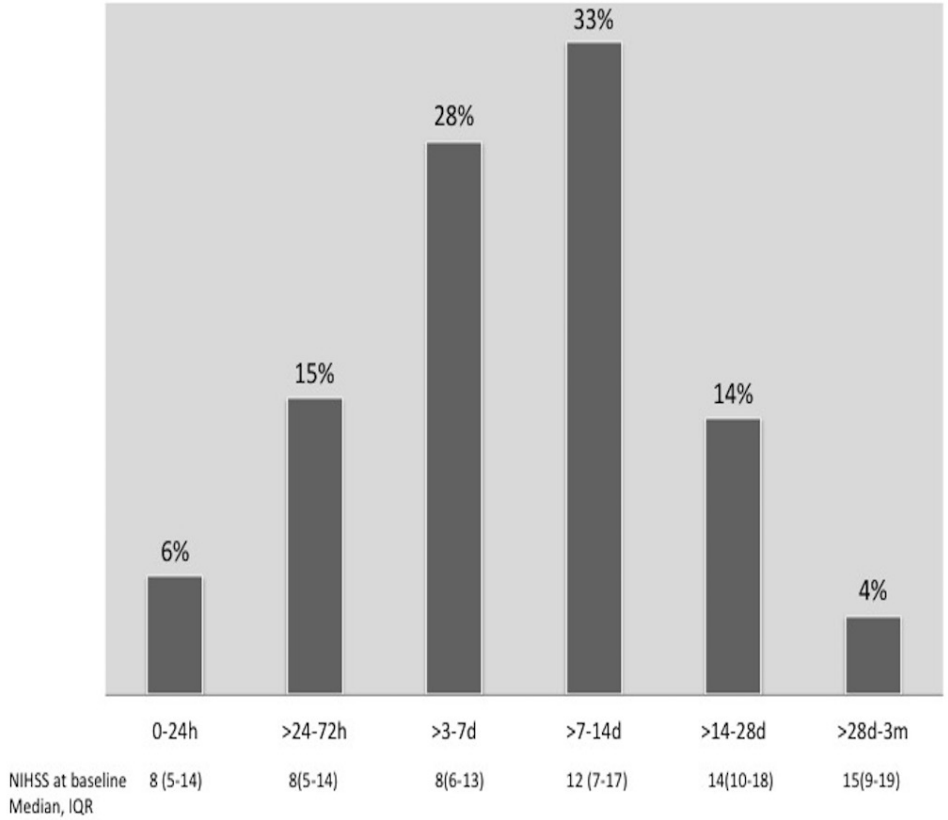

90x90mm (300 x 300 DPI)

|                                                        | < 24 h<br>n=73           | > 24 – 72 h<br>n=190     | > 3 – 7 d<br>n=344       | > 7 – 14 d<br>n=410      | > 14 – 28 d<br>n=174     | >28d – 3m<br>n=49              |
|--------------------------------------------------------|--------------------------|--------------------------|--------------------------|--------------------------|--------------------------|--------------------------------|
| Age (Mean, SD)<br>(Median, IQ)                         | 72 ± 11<br>(69-75)       | 74 ± 10<br>(73-76)       | 75 ± 9<br>(73-76)        | 75 ± 9<br>(74-77)        | 76 ± 9<br>(74-78)        | 77 ± 10<br>(73-80)             |
| Gender (N, %, Female)                                  | 29 (39.7%)               | 95 (50%)                 | 175 (50.9%)              | 225 (54.9%)              | 99 (56.9%)               | 33 (67.3%)                     |
| NIHSS baseline<br>(Median, IQ)                         | 8 (5-14)                 | 8 (5-14)                 | 8 (6-13)                 | 12 (7-17)                | 14 (10-18)               | 15 (9-19)                      |
| SBP<br>(mm Hg, Mean, SD)                               | 156 ± 22                 | 150 ± 21                 | 154 ± 22                 | 155 ± 23                 | 152 ± 22                 | 157 ± 29                       |
| DBP<br>(mm Hg, Mean, SD)                               | 87 ± 12                  | 83 ± 15                  | 84 ± 14                  | 85 ± 15                  | 85 ± 17                  | 91 ± 16                        |
| Glucose<br>(mmol/dl, Mean, SD)                         | 6.8 ± 1                  | 7.1 ± 3                  | 7.3 ± 2                  | 7.8 ± 3                  | 7.4 ± 2                  | 7.1 ± 2                        |
| Weight<br>(kg, Mean, SD)                               | 84 ± 16                  | 79 ± 15                  | 77 ± 15                  | 78 ± 15                  | 77 ± 16                  | 77 ± 17                        |
| Hypertension<br>(%)                                    | 75.3%                    | 77.9%                    | 74.9%                    | 79.9%                    | 76.3%                    | 77.6%                          |
| Diabetes<br>(%)                                        | 15.1%                    | 17.4%                    | 16.9%                    | 18.1%                    | 16.9%                    | 22.4%                          |
| Hyperlipidemia<br>(%)                                  | 29.6%                    | 33.5%                    | 25.5%                    | 34.4%                    | 21.9%                    | 26.5%                          |
| Previous TIA<br>(%)                                    | 5.5%                     | 6.8%                     | 6.2%                     | 3.4%                     | 5.8%                     | 6.1%                           |
| Current smoker<br>(%)                                  | 5.8%                     | 8.6%                     | 7.1%                     | 8.9%                     | 5.4%                     | 6.3%                           |
| Previous smoker<br>(%)                                 | 8.7%                     | 8.0%                     | 10.8%                    | 10.5%                    | 6.8%                     | 10.9%                          |
| Congestive heart failure<br>(%)                        | 12.3%                    | 7.4%                     | 8.7%                     | 13.2%                    | 11.6%                    | 14.3%                          |
| Vascular disease<br>(%)                                | 12.3%                    | 10.6%                    | 13.9%                    | 12.5%                    | 10.5%                    | 8.3%                           |
| Renal impairment<br>(%)                                | 2.0%                     | 2.8%                     | 2.1%                     | 3.5%                     | 1.2%                     | 2.2%                           |
| Abnormal liver function<br>(%)                         | 0.0%                     | 0.6%                     | 2.1%                     | 1.5%                     | 1.2%                     | 0.0%                           |
| Alcohol use<br>(%)                                     | 8.5%                     | 2.3%                     | 4.0%                     | 2.1%                     | 4.3%                     | 2.2%                           |
| History of / predisposition to bleeding<br>(%)         | 2.1%                     | 1.1%                     | 3.0%                     | 3.0%                     | 1.8%                     | 4.4%                           |
| Labile INR<br>(%)                                      | 0.0%                     | 4.8%                     | 3.1%                     | 2.7%                     | 5.8%                     | 4.5%                           |
| Previous AF<br>(%)                                     | 20.5%                    | 22.2%                    | 27.9%                    | 19.1%                    | 22.5%                    | 42.9%                          |
| Previous mRS<br>(Median, IQR)                          | 0<br>(0)                 | 0<br>(0)                 | 0<br>(0)                 | 0<br>(0)                 | 0<br>(0)                 | 0<br>(0-1)                     |
| Previous CHA2DS2-VASc<br>(Mean, 95%CI)<br>(Median, IQ) | 2.9 (2.5-3.2)<br>3 (1-5) | 3.2 (3-3.4)<br>3 (1-5)   | 3.2 (3-3.3)<br>3 (1-5)   | 3.2 (3.1-3.4)<br>3 (1-5) | 3.3 (3.-3.5)<br>3 (1-5)  | 3.4 (3.1-3.8)<br>3.5 (2.5-4.5) |
| Previous HAS-BLED<br>(Mean, 95%CI)<br>(Median, IQ)     | 1.1 (0.9-1.3)<br>1 (0-3) | 1.3 (1.2-1.3)<br>1 (0-2) | 1.2 (1.2-1.3)<br>1 (0-2) | 1.3 (1.2-1.4)<br>1 (0-1) | 1.2 (1-1.3)<br>1 (1-1)   | 1.2 (1.1-1.4)<br>1 (0-2)       |
| CHA2DS2-VASc<br>(Mean, 95%CI)<br>(Median, IQ)          | 4.7 (3.1-6.3)<br>5 (4-6) | 5 (3.7-6.3)<br>5 (4-6)   | 5 (3.6-6-4)<br>5 (4-6)   | 5.2 (3.8-6.6)<br>5 (4-6) | 5.2 (3.8-6.6)<br>5 (4-6) | 5.3 (4.2-6.4)<br>5 (4-6)       |
| HAS-BLED (Mean, 95%CI)<br>(Median, IQ)                 | 1.7 (0.9-2.5)<br>3 (2-3) | 1.7 (1-2.4)<br>3 (2-3)   | 1.7 (0.9-2.5)<br>3 (2-3) | 1.8 (1.1-2.5)<br>3 (2-3) | 1.7 (1-2.4)<br>3 (2-3)   | 1.8 (1.2-2.4)<br>3 (2-3)       |
| Signs of acute infarct<br>(N, %)                       | 11 (15.9%)               | 23 (14.5%)               | 33 (12%)                 | 36 (11.3%)               | 22 (15.9%)               | 3 (17.1%)                      |

**Supplementary Table I. Baseline characteristics according to time initiation.**



|                                                   | Dabigatran patients with available time of initiation<br>N = 1240 | Dabigatran patients NO timing information<br>N= 249 | P value |
|---------------------------------------------------|-------------------------------------------------------------------|-----------------------------------------------------|---------|
| Age (Mean, SD)<br>(Median, IQR)                   | 75 ± 10<br>(69-82)                                                | 74 ± 10<br>(69-80)                                  | 0.15    |
| Gender<br>(N, %, Female)                          | 656 (52.9%)                                                       | 132 (53%)                                           | 0.97    |
| NIHSS baseline<br>(Median, IQR)                   | 10 (6-16)                                                         | 14 (9-19)                                           | <0.001  |
| SBP<br>(mm Hg, Mean, SD)                          | 153 ± 23                                                          | 154 ± 25                                            | 0.31    |
| DBP<br>(mm Hg, Mean, SD)                          | 85 ± 15                                                           | 84 ± 14                                             | 0.23    |
| Glucose<br>(mmol/dl, Mean, SD)                    | 7.3 ± 2.3                                                         | 7.8 ± 5.1                                           | <0.001  |
| Weight<br>(kg, Mean, SD)                          | 78 ± 15                                                           | 77 ± 13                                             | 0.004   |
| Hypertension<br>(N, %)                            | 955 (77%)                                                         | 189 (75.9%)                                         | 0.63    |
| Diabetes<br>(N, %)                                | 216 (17.4%)                                                       | 48 (19.3%)                                          | 0.5     |
| Hyperlipidemia<br>(N, %)                          | 349 (28.1%)                                                       | 75 (30.1%)                                          | 0.04    |
| Previous TIA<br>(N, %)                            | 65 (5.3%)                                                         | 10 (4%)                                             | 0.48    |
| Current smoker<br>(N, %)                          | 88 (7.1%)                                                         | 15 (6%)                                             | 0.051   |
| Previous smoker<br>(N, %)                         | 107 (8.8%)                                                        | 30 (12.3%)                                          | 0.048   |
| Congestive heart failure<br>(N, %)                | 134 (10.9%)                                                       | 24 (9.6%)                                           | 0.57    |
| Vascular disease<br>(N, %)                        | 149 (12%)                                                         | 33 (13.3%)                                          | 0.6     |
| Renal impairment<br>(N, %)                        | 30 (2.6%)                                                         | 5 (2.4%)                                            | 0.88    |
| Abnormal liver function<br>(N, %)                 | 16 (1.4%)                                                         | 1 (0.5%)                                            | 0.5     |
| Alcohol use<br>(N, %)                             | 37 (3.2%)                                                         | 9 (4.3%)                                            | 0.44    |
| History of / predisposition to bleeding<br>(N, %) | 30 (2.6%)                                                         | 12 (5.7%)                                           | 0.02    |
| Labile INR<br>(N, %)                              | 39 (3.5%)                                                         | 5 (2.5%)                                            | 0.46    |
| Previous AF<br>(N,%)                              | 720 (58.6%)                                                       | 110 (44.4%)                                         | <0.001  |
| Previous mRS<br>(Median, IQR)                     | 0<br>(0-0)                                                        | 0<br>(0-0)                                          | 0.98    |
| Previous CHA2DS2-VASc (Mean)<br>(Median, IQR)     | 3.1<br>3 (2-4)                                                    | 3.1<br>3 (2-4)                                      | 0.31    |
| Previous HAS-BLED (Mean)<br>(Median, IQR)         | 1.7<br>1 (1-2)                                                    | 1.7<br>1 (1-2)                                      | 0.64    |
| CHA2DS2-VASc Discharge (Mean)<br>(Median, IQR)    | 5.1<br>5 (4-6)                                                    | 5.1<br>5 (4-6)                                      | 0.53    |
| HAS-BLED Discharge (Mean)<br>(Median, IQR)        | 2.7<br>3 (2-3)                                                    | 2.8<br>3 (2-3)                                      | 0.73    |
| IVT<br>(N, %)                                     | 1055 (85.1%)                                                      | 180 (72.3%)                                         | <0.001  |
| EVT<br>(N, %)                                     | 68 (5.5%)                                                         | 23 (9.2%)                                           | <0.001  |
| IVT+EVT<br>(N, %)                                 | 117 (9.4%)                                                        | 46 (18.5%)                                          | <0.001  |

**Supplementary Table II. Baseline characteristics of patients initiating dabigatran after the index event.**

1  
2  
3 **Legend Supplementary Figure 1. Histogram of initiation time periods, showing proportion of**  
4 **patients and median NIHSS at baseline for each group**  
5  
6  
7  
8  
9  
10  
11  
12  
13  
14  
15  
16  
17  
18  
19  
20  
21  
22  
23  
24  
25  
26  
27  
28  
29  
30  
31  
32  
33  
34  
35  
36  
37  
38  
39  
40  
41  
42  
43  
44  
45  
46  
47  
48  
49  
50  
51  
52  
53  
54  
55  
56  
57  
58  
59  
60

For peer review only

STROBE Statement—Checklist of items that should be included in reports of *cross-sectional studies*

|                              | Item No | Recommendation                                                                                                                                                                                    | Page No  |
|------------------------------|---------|---------------------------------------------------------------------------------------------------------------------------------------------------------------------------------------------------|----------|
| <b>Title and abstract</b>    | 1       | (a) Indicate the study's design with a commonly used term in the title or the abstract                                                                                                            | 3        |
|                              |         | (b) Provide in the abstract an informative and balanced summary of what was done and what was found                                                                                               | 3        |
| <b>Introduction</b>          |         |                                                                                                                                                                                                   |          |
| Background/rationale         | 2       | Explain the scientific background and rationale for the investigation being reported                                                                                                              | 5        |
| Objectives                   | 3       | State specific objectives, including any prespecified hypotheses                                                                                                                                  | 6        |
| <b>Methods</b>               |         |                                                                                                                                                                                                   |          |
| Study design                 | 4       | Present key elements of study design early in the paper                                                                                                                                           | 6        |
| Setting                      | 5       | Describe the setting, locations, and relevant dates, including periods of recruitment, exposure, follow-up, and data collection                                                                   | 6        |
| Participants                 | 6       | (a) Give the eligibility criteria, and the sources and methods of selection of participants                                                                                                       | 6        |
| Variables                    | 7       | Clearly define all outcomes, exposures, predictors, potential confounders, and effect modifiers. Give diagnostic criteria, if applicable                                                          | 7        |
| Data sources/<br>measurement | 8*      | For each variable of interest, give sources of data and details of methods of assessment (measurement). Describe comparability of assessment methods if there is more than one group              | 7        |
| Bias                         | 9       | Describe any efforts to address potential sources of bias                                                                                                                                         | 11       |
| Study size                   | 10      | Explain how the study size was arrived at                                                                                                                                                         | NA       |
| Quantitative variables       | 11      | Explain how quantitative variables were handled in the analyses. If applicable, describe which groupings were chosen and why                                                                      | 7        |
| Statistical methods          | 12      | (a) Describe all statistical methods, including those used to control for confounding                                                                                                             | 7        |
|                              |         | (b) Describe any methods used to examine subgroups and interactions                                                                                                                               | 7        |
|                              |         | (c) Explain how missing data were addressed                                                                                                                                                       | 7        |
|                              |         | (d) If applicable, describe analytical methods taking account of sampling strategy                                                                                                                | 7        |
|                              |         | (e) Describe any sensitivity analyses                                                                                                                                                             | 11       |
| <b>Results</b>               |         |                                                                                                                                                                                                   |          |
| Participants                 | 13*     | (a) Report numbers of individuals at each stage of study—eg numbers potentially eligible, examined for eligibility, confirmed eligible, included in the study, completing follow-up, and analysed | 8        |
|                              |         | (b) Give reasons for non-participation at each stage                                                                                                                                              | Figure 1 |
|                              |         | (c) Consider use of a flow diagram                                                                                                                                                                | Figure 1 |
| Descriptive data             | 14*     | (a) Give characteristics of study participants (eg demographic, clinical, social) and information on exposures and potential confounders                                                          | 8, table |
|                              |         | (b) Indicate number of participants with missing data for each variable of interest                                                                                                               | Figure 1 |
| Outcome data                 | 15*     | Report numbers of outcome events or summary measures                                                                                                                                              | 8        |

|    |                          |    |                                                                                                                                                                                                              |
|----|--------------------------|----|--------------------------------------------------------------------------------------------------------------------------------------------------------------------------------------------------------------|
| 1  |                          |    |                                                                                                                                                                                                              |
| 2  | Main results             | 16 | (a) Give unadjusted estimates and, if applicable, confounder-adjusted estimates and their precision (eg, 95% confidence interval). Make clear which confounders were adjusted for and why they were included |
| 3  |                          |    | Tables                                                                                                                                                                                                       |
| 4  |                          |    |                                                                                                                                                                                                              |
| 5  |                          |    |                                                                                                                                                                                                              |
| 6  |                          |    | (b) Report category boundaries when continuous variables were categorized                                                                                                                                    |
| 7  |                          |    | Table                                                                                                                                                                                                        |
| 8  |                          |    |                                                                                                                                                                                                              |
| 9  |                          |    | (c) If relevant, consider translating estimates of relative risk into absolute risk for a meaningful time period                                                                                             |
| 10 |                          |    | NA                                                                                                                                                                                                           |
| 11 | Other analyses           | 17 | Report other analyses done—eg analyses of subgroups and interactions, and sensitivity analyses                                                                                                               |
| 12 |                          |    | 9,11                                                                                                                                                                                                         |
| 13 |                          |    |                                                                                                                                                                                                              |
| 14 | <b>Discussion</b>        |    |                                                                                                                                                                                                              |
| 15 | Key results              | 18 | Summarise key results with reference to study objectives                                                                                                                                                     |
| 16 |                          |    | 9,10                                                                                                                                                                                                         |
| 17 | Limitations              | 19 | Discuss limitations of the study, taking into account sources of potential bias or imprecision. Discuss both direction and magnitude of any potential bias                                                   |
| 18 |                          |    | 11                                                                                                                                                                                                           |
| 19 |                          |    |                                                                                                                                                                                                              |
| 20 | Interpretation           | 20 | Give a cautious overall interpretation of results considering objectives, limitations, multiplicity of analyses, results from similar studies, and other relevant evidence                                   |
| 21 |                          |    | 10,111                                                                                                                                                                                                       |
| 22 |                          |    |                                                                                                                                                                                                              |
| 23 |                          |    |                                                                                                                                                                                                              |
| 24 | Generalisability         | 21 | Discuss the generalisability (external validity) of the study results                                                                                                                                        |
| 25 |                          |    | 11                                                                                                                                                                                                           |
| 26 | <b>Other information</b> |    |                                                                                                                                                                                                              |
| 27 | Funding                  | 22 | Give the source of funding and the role of the funders for the present study and, if applicable, for the original study on which the present article is based                                                |
| 28 |                          |    | 12                                                                                                                                                                                                           |
| 29 |                          |    |                                                                                                                                                                                                              |
| 30 |                          |    |                                                                                                                                                                                                              |

\*Give information separately for exposed and unexposed groups.

**Note:** An Explanation and Elaboration article discusses each checklist item and gives methodological background and published examples of transparent reporting. The STROBE checklist is best used in conjunction with this article (freely available on the Web sites of PLoS Medicine at <http://www.plosmedicine.org/>, Annals of Internal Medicine at <http://www.annals.org/>, and Epidemiology at <http://www.epidem.com/>). Information on the STROBE Initiative is available at [www.strobe-statement.org](http://www.strobe-statement.org).
