# Supplementary material for: Dabigatran initiation in patients with non-valvular AF and first acute ischaemic stroke: a retrospective observational study from the SITS registry
Source: PubMed Central journal article supplement — BMJ Open. 2020 May 19;10(5):e037234. doi: 10.1136/bmjopen-2020-037234 (PMC7247395; doi:10.1136/bmjopen-2020-037234), 2020-05-19
Supplement: bmjopen-2020-037234supp001.pdf [file bmjopen-2020-037234supp001.pdf]

|                                                        | < 24 h<br>n=73           | > 24 – 72 h<br>n=190     | > 3 – 7 d<br>n=344       | > 7 – 14 d<br>n=410      | > 14 – 28 d<br>n=174     | >28d – 3m<br>n=49              |
|--------------------------------------------------------|--------------------------|--------------------------|--------------------------|--------------------------|--------------------------|--------------------------------|
| Age (Mean, SD)<br>(Median, IQ)                         | 72 ± 11<br>(69-75)       | 74 ± 10<br>(73-76)       | 75 ± 9<br>(73-76)        | 75 ± 9<br>(74-77)        | 76 ± 9<br>(74-78)        | 77 ± 10<br>(73-80)             |
| Gender (N, %, Female)                                  | 29 (39.7%)               | 95 (50%)                 | 175 (50.9%)              | 225 (54.9%)              | 99 (56.9%)               | 33 (67.3%)                     |
| NIHSS baseline<br>(Median, IQ)                         | 8 (5-14)                 | 8 (5-14)                 | 8 (6-13)                 | 12 (7-17)                | 14 (10-18)               | 15 (9-19)                      |
| SBP<br>(mm Hg, Mean, SD)                               | 156 ± 22                 | 150 ± 21                 | 154 ± 22                 | 155 ± 23                 | 152 ± 22                 | 157 ± 29                       |
| DBP<br>(mm Hg, Mean, SD)                               | 87 ± 12                  | 83 ± 15                  | 84 ± 14                  | 85 ± 15                  | 85 ± 17                  | 91 ± 16                        |
| Glucose<br>(mmol/dl, Mean, SD)                         | 6.8 ± 1                  | 7.1 ± 3                  | 7.3 ± 2                  | 7.8 ± 3                  | 7.4 ± 2                  | 7.1 ± 2                        |
| Weight<br>(kg, Mean, SD)                               | 84 ± 16                  | 79 ± 15                  | 77 ± 15                  | 78 ± 15                  | 77 ± 16                  | 77 ± 17                        |
| Hypertension<br>(%)                                    | 75.3%                    | 77.9%                    | 74.9%                    | 79.9%                    | 76.3%                    | 77.6%                          |
| Diabetes<br>(%)                                        | 15.1%                    | 17.4%                    | 16.9%                    | 18.1%                    | 16.9%                    | 22.4%                          |
| Hyperlipidemia<br>(%)                                  | 29.6%                    | 33.5%                    | 25.5%                    | 34.4%                    | 21.9%                    | 26.5%                          |
| Previous TIA<br>(%)                                    | 5.5%                     | 6.8%                     | 6.2%                     | 3.4%                     | 5.8%                     | 6.1%                           |
| Current smoker<br>(%)                                  | 5.8%                     | 8.6%                     | 7.1%                     | 8.9%                     | 5.4%                     | 6.3%                           |
| Previous smoker<br>(%)                                 | 8.7%                     | 8.0%                     | 10.8%                    | 10.5%                    | 6.8%                     | 10.9%                          |
| Congestive heart failure<br>(%)                        | 12.3%                    | 7.4%                     | 8.7%                     | 13.2%                    | 11.6%                    | 14.3%                          |
| Vascular disease<br>(%)                                | 12.3%                    | 10.6%                    | 13.9%                    | 12.5%                    | 10.5%                    | 8.3%                           |
| Renal impairment<br>(%)                                | 2.0%                     | 2.8%                     | 2.1%                     | 3.5%                     | 1.2%                     | 2.2%                           |
| Abnormal liver function<br>(%)                         | 0.0%                     | 0.6%                     | 2.1%                     | 1.5%                     | 1.2%                     | 0.0%                           |
| Alcohol use<br>(%)                                     | 8.5%                     | 2.3%                     | 4.0%                     | 2.1%                     | 4.3%                     | 2.2%                           |
| History of / predisposition to bleeding<br>(%)         | 2.1%                     | 1.1%                     | 3.0%                     | 3.0%                     | 1.8%                     | 4.4%                           |
| Labile INR<br>(%)                                      | 0.0%                     | 4.8%                     | 3.1%                     | 2.7%                     | 5.8%                     | 4.5%                           |
| Previous AF<br>(%)                                     | 20.5%                    | 22.2%                    | 27.9%                    | 19.1%                    | 22.5%                    | 42.9%                          |
| Previous mRS<br>(Median, IQR)                          | 0<br>(0)                 | 0<br>(0)                 | 0<br>(0)                 | 0<br>(0)                 | 0<br>(0)                 | 0<br>(0-1)                     |
| Previous CHA2DS2-VASc<br>(Mean, 95%CI)<br>(Median, IQ) | 2.9 (2.5-3.2)<br>3 (1-5) | 3.2 (3-3.4)<br>3 (1-5)   | 3.2 (3-3.3)<br>3 (1-5)   | 3.2 (3.1-3.4)<br>3 (1-5) | 3.3 (3.-3.5)<br>3 (1-5)  | 3.4 (3.1-3.8)<br>3.5 (2.5-4.5) |
| Previous HAS-BLED<br>(Mean, 95%CI)<br>(Median, IQ)     | 1.1 (0.9-1.3)<br>1 (0-3) | 1.3 (1.2-1.3)<br>1 (0-2) | 1.2 (1.2-1.3)<br>1 (0-2) | 1.3 (1.2-1.4)<br>1 (0-1) | 1.2 (1-1.3)<br>1 (1-1)   | 1.2 (1.1-1.4)<br>1 (0-2)       |
| CHA2DS2-VASc<br>(Mean, 95%CI)<br>(Median, IQ)          | 4.7 (3.1-6.3)<br>5 (4-6) | 5 (3.7-6.3)<br>5 (4-6)   | 5 (3.6-6.4)<br>5 (4-6)   | 5.2 (3.8-6.6)<br>5 (4-6) | 5.2 (3.8-6.6)<br>5 (4-6) | 5.3 (4.2-6.4)<br>5 (4-6)       |
| HAS-BLED (Mean, 95%CI)<br>(Median, IQ)                 | 1.7 (0.9-2.5)<br>3 (2-3) | 1.7 (1-2.4)<br>3 (2-3)   | 1.7 (0.9-2.5)<br>3 (2-3) | 1.8 (1.1-2.5)<br>3 (2-3) | 1.7 (1-2.4)<br>3 (2-3)   | 1.8 (1.2-2.4)<br>3 (2-3)       |
| Signs of acute infarct<br>(N, %)                       | 11 (15.9%)               | 23 (14.5%)               | 33 (12%)                 | 36 (11.3%)               | 22 (15.9%)               | 3 (17.1%)                      |

Supplementary Table I. Baseline characteristics according to time initiation.

|                                                   | Dabigatran patients with available time of initiation<br>N = 1240 | Dabigatran patients NO timing information<br>N= 249 | P value |
|---------------------------------------------------|-------------------------------------------------------------------|-----------------------------------------------------|---------|
| Age (Mean, SD)<br>(Median, IQR)                   | 75 ± 10<br>(69-82)                                                | 74 ± 10<br>(69-80)                                  | 0.15    |
| Gender<br>(N, %, Female)                          | 656 (52.9%)                                                       | 132 (53%)                                           | 0.97    |
| NIHSS baseline<br>(Median, IQR)                   | 10 (6-16)                                                         | 14 (9-19)                                           | <0.001  |
| SBP<br>(mm Hg, Mean, SD)                          | 153 ± 23                                                          | 154 ± 25                                            | 0.31    |
| DBP<br>(mm Hg, Mean, SD)                          | 85 ± 15                                                           | 84 ± 14                                             | 0.23    |
| Glucose<br>(mmol/dl, Mean, SD)                    | 7.3 ± 2.3                                                         | 7.8 ± 5.1                                           | <0.001  |
| Weight<br>(kg, Mean, SD)                          | 78 ± 15                                                           | 77 ± 13                                             | 0.004   |
| Hypertension<br>(N, %)                            | 955 (77%)                                                         | 189 (75.9%)                                         | 0.63    |
| Diabetes<br>(N, %)                                | 216 (17.4%)                                                       | 48 (19.3%)                                          | 0.5     |
| Hyperlipidemia<br>(N, %)                          | 349 (28.1%)                                                       | 75 (30.1%)                                          | 0.04    |
| Previous TIA<br>(N, %)                            | 65 (5.3%)                                                         | 10 (4%)                                             | 0.48    |
| Current smoker<br>(N, %)                          | 88 (7.1%)                                                         | 15 (6%)                                             | 0.051   |
| Previous smoker<br>(N, %)                         | 107 (8.8%)                                                        | 30 (12.3%)                                          | 0.048   |
| Congestive heart failure<br>(N, %)                | 134 (10.9%)                                                       | 24 (9.6%)                                           | 0.57    |
| Vascular disease<br>(N, %)                        | 149 (12%)                                                         | 33 (13.3%)                                          | 0.6     |
| Renal impairment<br>(N, %)                        | 30 (2.6%)                                                         | 5 (2.4%)                                            | 0.88    |
| Abnormal liver function<br>(N, %)                 | 16 (1.4%)                                                         | 1 (0.5%)                                            | 0.5     |
| Alcohol use<br>(N, %)                             | 37 (3.2%)                                                         | 9 (4.3%)                                            | 0.44    |
| History of / predisposition to bleeding<br>(N, %) | 30 (2.6%)                                                         | 12 (5.7%)                                           | 0.02    |
| Labile INR<br>(N, %)                              | 39 (3.5%)                                                         | 5 (2.5%)                                            | 0.46    |
| Previous AF<br>(N, %)                             | 720 (58.6%)                                                       | 110 (44.4%)                                         | <0.001  |
| Previous mRS<br>(Median, IQR)                     | 0<br>(0-0)                                                        | 0<br>(0-0)                                          | 0.98    |
| Previous CHA2DS2-VASc (Mean)<br>(Median, IQR)     | 3.1<br>3 (2-4)                                                    | 3.1<br>3 (2-4)                                      | 0.31    |
| Previous HAS-BLED (Mean)<br>(Median, IQR)         | 1.7<br>1 (1-2)                                                    | 1.7<br>1 (1-2)                                      | 0.64    |
| CHA2DS2-VASc Discharge (Mean)<br>(Median, IQR)    | 5.1<br>5 (4-6)                                                    | 5.1<br>5 (4-6)                                      | 0.53    |
| HAS-BLED Discharge (Mean)<br>(Median, IQR)        | 2.7<br>3 (2-3)                                                    | 2.8<br>3 (2-3)                                      | 0.73    |
| IVT<br>(N, %)                                     | 1055 (85.1%)                                                      | 180 (72.3%)                                         | <0.001  |
| EVT<br>(N, %)                                     | 68 (5.5%)                                                         | 23 (9.2%)                                           | <0.001  |
| IVT+EVT<br>(N, %)                                 | 117 (9.4%)                                                        | 46 (18.5%)                                          | <0.001  |

**Supplementary Table II. Baseline characteristics of patients initiating dabigatran after the index event.**

**Legend Supplementary Figure 1. Histogram of initiation time periods, showing proportion of patients and median NIHSS at baseline for each group**
