# Supplementary figures and images for: Dabigatran initiation in patients with non-valvular AF and first acute ischaemic stroke: a retrospective observational study from the SITS registry
Source: PubMed Central journal article supplement — BMJ Open. 2020 May 19;10(5):e037234. doi: 10.1136/bmjopen-2020-037234 (PMC7247395; doi:10.1136/bmjopen-2020-037234), 2020-05-19

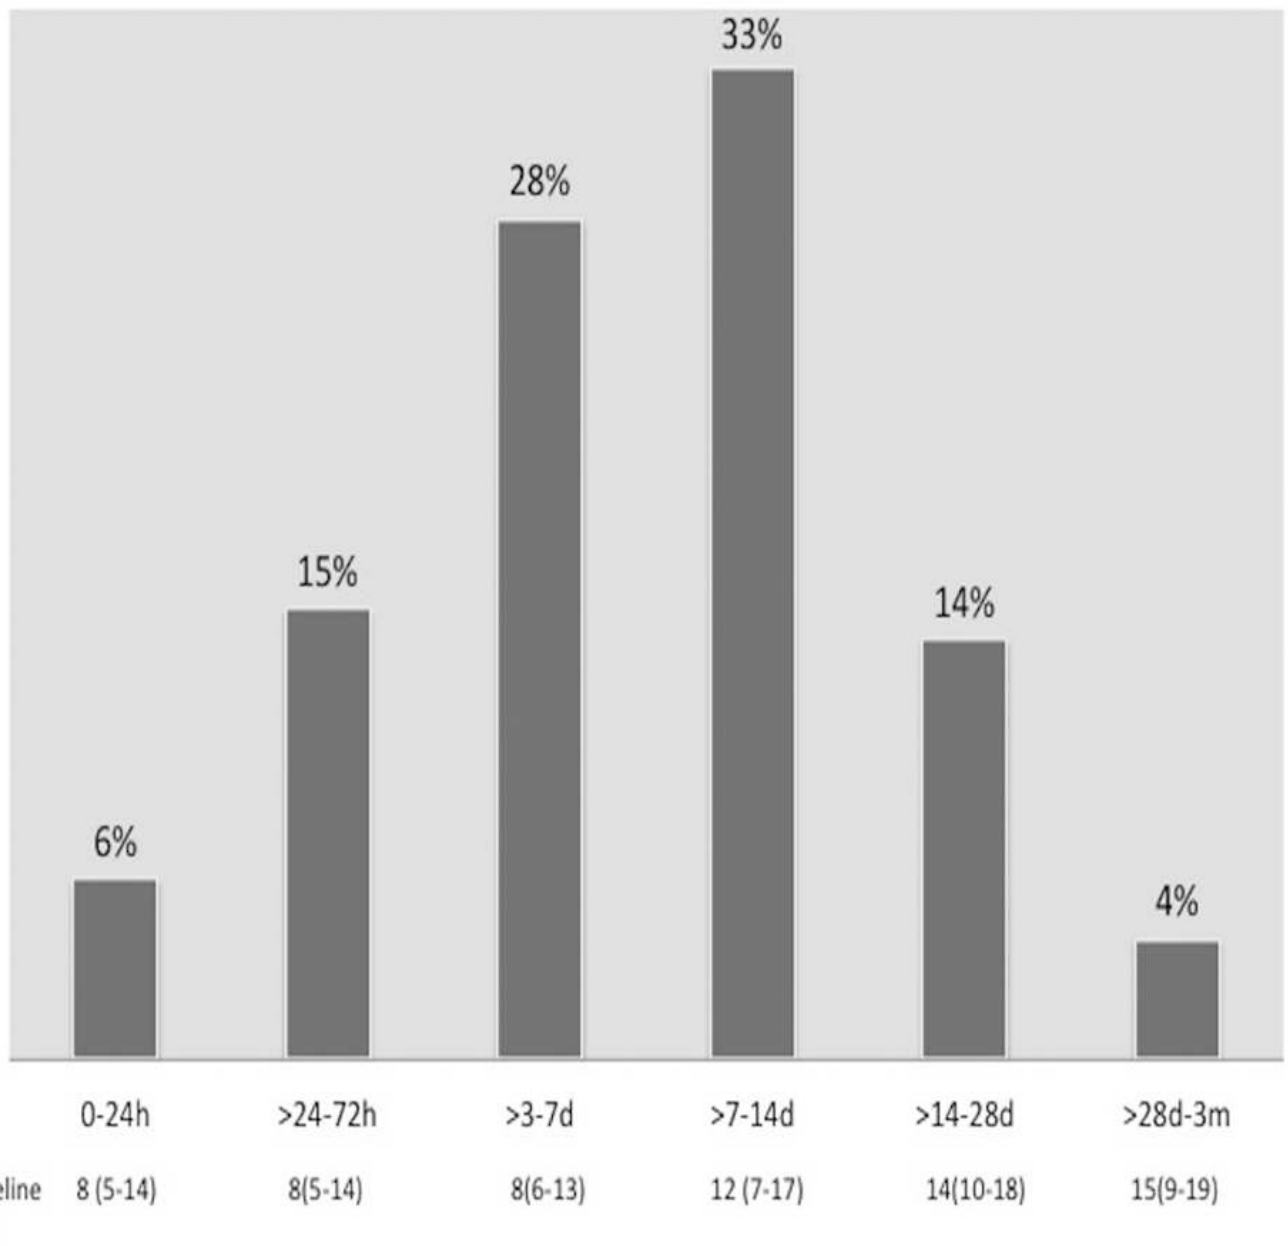

Supplement: bmjopen-2020-037234supp002.pdf [file bmjopen-2020-037234supp002.pdf]
